# Supplementary material
Source: HighWire-hosted journal article supplement (https://erj.ersjournals.com/content/57/4/2003201)
Supplement: inline-supplementary-material-1 [file inline-supplementary-material-1.pdf]

## Online data supplement – Supplementary methods, tables and figures

### Metabolomics in CTEPH by Swietlik et al.

#### Table of Contents

|                                                                              |       |
|------------------------------------------------------------------------------|-------|
| Supplementary Methods                                                        | 2     |
| Supplementary Table S1. Cohort Characteristics for CTEPH analysis.           | 3-4   |
| Supplementary Table S2. Altered plasma metabolite profiles in CTEPH patients | 5-8   |
| Supplementary Table S3. Age and sex effects on CTEPH metabolites             | 9-11  |
| Supplementary Table S4. ROC analysis                                         | 12-13 |
| Supplementary Table S5. Changes in metabolomic profile pre- and post-PEA     | 14-15 |
| Supplementary Table S6. Full list of metabolites with tissue gradients       | 16-26 |
| Supplementary Table S7. Enrichment analysis of all pathways.                 | 27-28 |
| Supplementary Figure S1. Age and sex effects on CTEPH metabolites            | 29-30 |
| Supplementary Figure S2. Relevance network analysis.                         | 31    |
| Supplementary Figure S3. Clinical variables and metabolites                  | 32    |
| Supplementary References                                                     | 33    |



## **Supplementary Methods**

### **Assessment of operability**

All patients with chronic thromboembolic pulmonary hypertension (CTEPH) included in the study were assessed in pulmonary endarterectomy (PEA) multidisciplinary team meetings (MDT) involving at least one cardiothoracic surgeon, cardiothoracic radiologist and chest physician. Technical operability was established based on surgical accessibility of thromboembolic material assessed by CT pulmonary angiogram and ventilation perfusion scan, in conjunction with thrombus burden and PVR.

### **PEA surgical procedure**

PEA involves removal of obstructive thromboembolic material from the pulmonary arteries including the intima and superficial media in order to reduce PVR, decrease right ventricle (RV) afterload and improve ventilation-perfusion mismatch. PEA was performed through median sternotomy with cardiopulmonary bypass (CPB) enabling hypothermia to 20°C and safe circulatory arrest(1). Deep hypothermic circulatory arrest (DHCA) provided a clear operating field and was limited to 20 minutes intervals on each side. The identification of endarterectomy plane was followed by distal dissection to remove endarterectomy specimen as previously described(2, 3).

### **Right heart catheterisation (RHC) procedure and sampling at 3 anatomical locations**

All patients sampled at 3 anatomical locations had elective RHC performed via right internal jugular (RIJ) vein. The access area was cleaned with 2% chlorhexidine and infiltrated with 6 to 9 ml of local aesthetic (1% lignocaine), position of RIJ was confirmed with ultrasound under sterile conditions. 7 French sheath was introduced to the RIJ using a Seldinger technique. Pressure transducer was set to zero at mid-thoracic level(1). Swan Ganz catheter was inserted and the position of the catheter was confirmed by pressure trace and fluoroscopy screening. First sample was obtained from SVC with the catheter tip just above right atrium entry, subsequently catheter was advanced and RA pressure was measured. Next the catheter was floated to the RV, where RV systolic pressure (RVSP) and end-diastolic pressure were recorded. Upon advancing the catheter to pulmonary artery (PA) systolic and diastolic pressure were measured (sPAP and dPAP) and the PA blood sample was obtained for the metabolomic analysis. After that the balloon was inflated and advanced to the distal portion of pulmonary artery in order to obtain pulmonary artery wedge pressure (PAWP). Subsequently cardiac output was measured using thermodilution technique. Saturation run was performed at the end of RHC while removing the catheter, 3 ml samples for oximetry analysis were taken from PA, RV, RA and SVC. Finally, peripheral arterial sample for metabolomics analysis was obtained from distal portion of radial artery.

|                                          | Operable CTEPH<br>sampled pre-PEA | Operable CTEPH<br>sampled post-PEA | Operable CTEPH with<br>paired samples<br>pre/post-PEA | p-value |
|------------------------------------------|-----------------------------------|------------------------------------|-------------------------------------------------------|---------|
|                                          | N=64                              | N=82                               | N=43                                                  |         |
| <b>Baseline characteristics</b>          |                                   |                                    |                                                       |         |
| Age at sampling<br>[years]               | 65 [50;74]                        | 67 [54;75]                         | 63 [55;72]                                            | 0.416   |
| Time from<br>sampling to<br>PEA [months] | 8.7[12.7;6.9]                     |                                    | 7.7[5.6;9.9]                                          |         |
| Sex: F                                   | 23 (36%)                          | 37 (45%)                           | 15 (35%)                                              | 0.406   |
| Ethnicity:<br>European                   | 41 (64%)                          | 69 (84%)                           | 37 (86%)                                              | 0.005   |
| BMI [kg/m <sup>2</sup> ]                 | 28 [25;31]                        | 29 [25;33]                         | 28 [25;33]                                            | 0.617   |
| WHO functional<br>class:                 |                                   |                                    |                                                       | 0.022   |
| I                                        | 4 (7%)                            | 12 (15%)                           | 1 (2%)                                                |         |
| II                                       | 15 (25%)                          | 29 (36%)                           | 8 (19%)                                               |         |
| III                                      | 39 (65%)                          | 35 (44%)                           | 31 (72%)                                              |         |
| IV                                       | 2 (3%)                            | 4 (5%)                             | 3 (7%)                                                |         |
| 6MWD [m]                                 | 240 [96;384]                      | 382 [286;427]                      | 336 [240;363]                                         | 0.002   |
| Creatinine<br>[mmol/l]                   | 90 [73;103]                       | 79 [70;90]                         | 86 [75;100]                                           | 0.063   |
| Bilirubin [μmol/l]                       | 12 [9;19]                         | 10 [8;14]                          | 15 [9;20]                                             | 0.056   |
| mRAP[mmHg]                               | 8 [6;13]                          | 10 [7;14]                          | 8 [6;13]                                              | 0.076   |
| mPAP[mmHg]                               | 44 (14)                           | 48 (11)                            | 43 (12)                                               | 0.075   |
| mPAWP[mmHg]                              | 12 [9;16]                         | 13 [10;15]                         | 10 [9;12]                                             | 0.064   |
| PVR[WU]                                  | 7.1 [4.5;10.6]                    | 7.8 [5.2;11.5]                     | 7.9 [5.9;10.3]                                        | 0.807   |
| CO[L/min]                                | 4.1 [3.4;5.0]                     | 3.8 [2.9;4.8]                      | 4.0 [3.5;4.5]                                         | 0.494   |
| COPD                                     | 7 (11%)                           | 12 (15%)                           | 3 (7%)                                                | 0.437   |
| Diabetes                                 | 5 (8%)                            | 5 (6%)                             | 6 (14%)                                               | 0.330   |
| Atherosclerosis                          | 17 (27%)                          | 20 (24%)                           | 12 (55%)                                              | 0.019   |
| Atrial arrhythmia                        | 11 (17%)                          | 23 (28%)                           | 8 (19%)                                               | 0.238   |
| Hypertension                             | 19 (30%)                          | 26 (32%)                           | 9 (21%)                                               | 0.435   |
| Dyslipidemia                             | 17 (27%)                          | 12 (15%)                           | 11 (26%)                                              | 0.156   |
| <b>Post pulmonary endarterectomy</b>     |                                   |                                    |                                                       |         |
| Time from PEA<br>to sampling<br>[months] |                                   | 37[11.8;65.2]                      | 5.8[ 4.7;11.9]                                        |         |
| mPAP [mmHg]                              |                                   | 28 (11)                            | 28 (10)                                               |         |
| PVR [WU]                                 |                                   | 1[0.99;3.9]                        | 1.8 [0.97;3.4]                                        |         |

### Supplementary Table S1. Cohort Characteristics for CTEPH analysis.

Significance is shown using Kruskal-Wallis (continuous) and Chi-squared tests (categorical) showing only minor differences in baseline characteristics between groups. Means and standard deviations, median and IQR and counts are given. BMI, body mass index; WHO, World Health Organisation; 6MWD, six-minute walk distance; mRAP, mean right atrial pressure; mPAP, mean pulmonary artery pressure; mPAWP, mean pulmonary artery wedge pressure; PVR, pulmonary artery resistance; CO, cardiac output; COPD, chronic obstructive

pulmonary disease; PEA, pulmonary endarterectomy. Ethnicity is shown for subjects who self-declared.

|                                                     |                                                      | Discovery    |             |                 | Validation   |             |                 | Linear regression with confounders |                       |                 | Comparator groups |                 |              |                 |
|-----------------------------------------------------|------------------------------------------------------|--------------|-------------|-----------------|--------------|-------------|-----------------|------------------------------------|-----------------------|-----------------|-------------------|-----------------|--------------|-----------------|
| Metabolite                                          | Metabolic pathway                                    | CTEPH        | HC          | Sig.            | CTEPH        | HC          | Sig.            | HC vs CTEPH                        | Main confounder vs HC | DC vs CTEPH     | CTED              | Sig.            | IPAH         | Sig.            |
|                                                     |                                                      | mean (SD)    | mean (SD)   |                 | mean (SD)    | mean (SD)   |                 | Sig.                               |                       | Sig.            | mean (SD)         |                 | mean (SD)    |                 |
| <b>Significant in all analyses</b>                  |                                                      |              |             |                 |              |             |                 |                                    |                       |                 |                   |                 |              |                 |
| 5-methylthioadenosine (MTA)                         | Polyamine Metabolism                                 | 1.72 (0.84)  | 0.07 (1.22) | <b>5.00E-17</b> | 1.55 (0.91)  | 0.32 (1.12) | <b>6.95E-12</b> | <b>5.21E-05</b>                    |                       | <b>0.0009</b>   | 1.34 (0.73)       | <b>0.0019</b>   | 0.86 (1.26)  | <b>3.75E-13</b> |
| N1-methyladenosine                                  | Purine Metabolism, Adenine containing                | 1.58 (0.78)  | 0.03 (1.01) | <b>3.02E-17</b> | 1.67 (0.61)  | 0.4 (1.1)   | <b>8.10E-14</b> | <b>4.55E-05</b>                    |                       | <b>0.0105</b>   | 0.91 (1.08)       | <b>2.07E-06</b> | 1.21 (0.93)  | <b>1.56E-06</b> |
| N1-methylinosine                                    | Purine Metabolism, (Hypo)Xanthine/Inosine containing | 1.64 (1.54)  | 0 (1.1)     | <b>1.51E-12</b> | 1.91 (1.45)  | 0.41 (1.06) | <b>8.70E-13</b> | <b>7.20E-05</b>                    |                       | <b>2.35E-05</b> | 1.59 (1.11)       | <b>0.0406</b>   | 1.65 (1.11)  | <b>0.008</b>    |
| 7-methylguanine                                     | Purine Metabolism, Guanine containing                | 1.23 (1.09)  | 0.01 (1.16) | <b>8.47E-10</b> | 1.27 (1.25)  | 0.45 (1.19) | <b>0.0001</b>   | <b>0.0007</b>                      |                       | <b>0.0099</b>   | 0.54 (1.08)       | <b>4.18E-05</b> | 0.95 (1.28)  | <b>0.019</b>    |
| N-formylmethionine                                  | Methionine, Cysteine, SAM and Taurine Metabolism     | 1.45 (0.88)  | 0.05 (1.02) | <b>6.10E-14</b> | 1.51 (0.78)  | 0.36 (1.11) | <b>4.27E-11</b> | <b>0.0024</b>                      |                       | <b>0.0042</b>   | 1.22 (0.78)       | <b>0.014</b>    | 1.31 (0.86)  | <b>0.0406</b>   |
| <b>Significant versus HC, DC and CTED</b>           |                                                      |              |             |                 |              |             |                 |                                    |                       |                 |                   |                 |              |                 |
| sphingomyelin (d18:1/20:0, d16:1/22:0)*             | Sphingomyelins                                       | -0.91 (0.75) | 0.3 (1.19)  | <b>2.52E-10</b> | -0.71 (0.7)  | 0.1 (1.06)  | <b>7.45E-07</b> | <b>9.64E-05</b>                    |                       | <b>0.0402</b>   | -0.28 (0.96)      | <b>7.81E-05</b> | -0.93 (0.91) | 0.0655          |
| 1-stearoyl-2-arachidonoyl-GPC (18:0/20:4)           | Phosphatidylcholine (PC)                             | -0.69 (0.62) | 0.14 (1.19) | <b>3.28E-06</b> | -0.53 (0.69) | 0.26 (1.16) | <b>4.62E-06</b> | <b>0.002</b>                       |                       | <b>0.0007</b>   | -0.25 (0.75)      | <b>0.0005</b>   | -0.48 (0.85) | 0.0989          |
| N2,N2-dimethylguanosine                             | Purine Metabolism, Guanine containing                | 2 (0.69)     | 0.15 (0.99) | <b>8.50E-21</b> | 1.9 (0.79)   | 0.28 (1.18) | <b>5.02E-15</b> | <b>4.73E-06</b>                    |                       | <b>1.10E-06</b> | 1.35 (0.82)       | <b>6.44E-07</b> | 1.81 (0.9)   | 0.1246          |
| sphingomyelin (d18:1/21:0, d17:1/22:0, d16:1/23:0)* | Sphingomyelins                                       | -0.87 (0.9)  | 0.36 (1.18) | <b>8.60E-11</b> | -0.56 (0.74) | 0.17 (1.03) | <b>1.53E-06</b> | <b>1.25E-05</b>                    |                       | <b>0.0161</b>   | -0.15 (1.32)      | <b>0.0032</b>   | -0.77 (0.76) | 0.3203          |
| N-acetylmethionine                                  | Methionine, Cysteine, SAM and Taurine Metabolism     | 1.17 (0.76)  | 0.18 (1.09) | <b>1.42E-10</b> | 1.16 (0.75)  | 0.21 (1.16) | <b>1.00E-08</b> | <b>0.0286</b>                      |                       | <b>0.031</b>    | 0.44 (1.03)       | <b>7.22E-08</b> | 1.12 (0.7)   | 0.3691          |
| 1-linoleoyl-2-arachidonoyl-GPC (18:2/20:4n6)*       | Phosphatidylcholine (PC)                             | -0.78 (0.63) | 0.13 (1.2)  | <b>1.87E-09</b> | -0.54 (0.55) | 0.32 (1.22) | <b>2.20E-10</b> | <b>0.001</b>                       |                       | <b>0.0116</b>   | -0.3 (0.66)       | <b>9.38E-05</b> | -0.7 (0.92)  | 0.5379          |
| pseudouridine                                       | Pyrimidine Metabolism, Uracil containing             | 1.63 (0.78)  | 0.19 (0.97) | <b>8.02E-17</b> | 1.67 (0.63)  | 0.26 (1.26) | <b>2.29E-13</b> | <b>0.0018</b>                      |                       | <b>0.0425</b>   | 1.28 (0.82)       | <b>0.0024</b>   | 1.57 (1.01)  | 0.8223          |

|                                                      |                                                      |                 |                |                 |                 |                 |                 |               |  |               |                 |          |                 |          |
|------------------------------------------------------|------------------------------------------------------|-----------------|----------------|-----------------|-----------------|-----------------|-----------------|---------------|--|---------------|-----------------|----------|-----------------|----------|
| Significant versus HC, DC independent of confounders |                                                      |                 |                |                 |                 |                 |                 |               |  |               |                 |          |                 |          |
| 1,2-dilinoeoyl-GPC (18:2/18:2)                       | Phosphatidylcholine (PC)                             | -0.78<br>(0.75) | 0.11<br>(1.25) | <b>5.91E-07</b> | -0.7<br>(0.67)  | 0.36<br>(1)     | <b>7.68E-11</b> | <b>0.0025</b> |  | <b>0.0069</b> | -0.54<br>(0.79) | 0.1446   | -0.58<br>(0.93) | 0.1023   |
| N-acetylphenylalanine                                | Phenylalanine Metabolism                             | 1<br>(0.94)     | 0.11<br>(1.11) | <b>9.94E-08</b> | 0.98<br>(1.05)  | 0.27<br>(1.13)  | <b>5.42E-05</b> | <b>0.0217</b> |  | <b>0.0029</b> | 1.11<br>(0.88)  | 0.3722   | 0.85<br>(0.94)  | 0.1535   |
| gamma-glutamyl-epsilon-lysine                        | Gamma-glutamyl Amino Acid                            | -1.06<br>(1.03) | 0.33<br>(1.35) | <b>2.38E-09</b> | -0.98<br>(1.05) | 0.05<br>(1.43)  | <b>7.68E-06</b> | <b>0.0169</b> |  | <b>0.0464</b> | -1.11<br>(0.91) | 0.4414   | -0.35<br>(1.15) | 1.82E-09 |
| sphingomyelin (d18:1/17:0, d17:1/18:0, d19:1/16:0)   | Sphingomyelins                                       | -0.7 (1)        | 0.35<br>(1.15) | <b>4.63E-08</b> | -0.54<br>(0.85) | 0.14<br>(1.21)  | <b>0.0001</b>   | <b>0.0239</b> |  | <b>0.0273</b> | -0.66<br>(1.19) | 0.5115   | -0.5<br>(1.05)  | 0.4819   |
| oxalate (ethanedioate)                               | Ascorbate and Aldarate Metabolism                    | -0.7<br>(1.07)  | 0.28<br>(1)    | <b>4.13E-08</b> | -0.92<br>(0.91) | 0.18<br>(1.29)  | <b>8.36E-08</b> | <b>0.0087</b> |  | <b>0.0023</b> | -0.8<br>(1.25)  | 0.5194   | -0.54<br>(1.04) | 0.009    |
| 1-(1-enyl-palmitoyl)-2-linoleoyl-GPC (P-16:0/18:2)*  | Plasmalogen                                          | -0.95<br>(1.06) | 0.27<br>(1.17) | <b>3.17E-09</b> | -1.08<br>(1.24) | 0.16<br>(1.21)  | <b>6.04E-08</b> | <b>0.0065</b> |  | <b>0.0446</b> | -0.87<br>(1.33) | 0.6299   | -0.99<br>(1.12) | 0.5948   |
| 2-hydroxypalmitate                                   | Fatty Acid, Monohydroxy                              | 1.08<br>(0.86)  | 0.29<br>(1.12) | <b>8.56E-06</b> | 0.94<br>(0.99)  | 0.2<br>(1.19)   | <b>5.34E-05</b> | <b>0.0002</b> |  | <b>0.0005</b> | 1.01<br>(0.91)  | 0.909    | 0.85<br>(0.95)  | 0.052    |
| Significant versus HC independent of confounders     |                                                      |                 |                |                 |                 |                 |                 |               |  |               |                 |          |                 |          |
| sphingomyelin (d18:1/22:1, d18:2/22:0, d16:1/24:1)*  | Sphingomyelins                                       | -0.87<br>(0.81) | 0.34<br>(1.24) | <b>7.45E-10</b> | -0.71<br>(0.82) | 0.1<br>(1)      | <b>5.21E-07</b> | <b>0.0002</b> |  | 0.0549        | 0<br>(0.86)     | 8.20E-09 | -0.98<br>(0.97) | 0.018    |
| dimethylarginine (SDMA + ADMA)                       | Urea cycle; Arginine and Proline Metabolism          | 1.3<br>(1.02)   | 0.08<br>(1.09) | <b>1.04E-10</b> | 1.24<br>(0.89)  | 0.34<br>(1.04)  | <b>4.49E-08</b> | <b>0.0003</b> |  | 0.0596        | 0.86<br>(1.07)  | 0.0043   | 1.07<br>(1.02)  | 0.0264   |
| methionine sulfone                                   | Methionine, Cysteine, SAM and Taurine Metabolism     | 1.22<br>(1.39)  | 0.22<br>(1.1)  | <b>1.30E-05</b> | 1.58<br>(1.3)   | 0.17<br>(1.14)  | <b>6.98E-10</b> | <b>0.0025</b> |  | 0.0606        | 0.28<br>(1.26)  | 3.34E-07 | 1.75<br>(1.27)  | 0.006    |
| kynurenine                                           | Tryptophan Metabolism                                | 1.24<br>(0.95)  | 0.12<br>(1.13) | <b>1.62E-08</b> | 1.37<br>(1.12)  | 0.31<br>(1.31)  | <b>1.42E-06</b> | <b>0.0159</b> |  | 0.0694        | 0.88<br>(1.38)  | 0.1004   | 1.25<br>(1.11)  | 0.6286   |
| androsterone sulfate                                 | Androgenic Steroids                                  | -1.28<br>(1.28) | 0.26<br>(1.19) | <b>2.59E-11</b> | -1.43<br>(1.43) | 0.2<br>(1.47)   | <b>4.26E-10</b> | <b>0.0005</b> |  | 0.0728        | -0.45<br>(1.5)  | 2.57E-05 | -1.28<br>(1.36) | 0.5555   |
| sphingomyelin (d18:2/23:0, d18:1/23:1, d17:1/24:1)*  | Sphingomyelins                                       | -0.61<br>(0.81) | 0.39<br>(1.05) | <b>1.90E-10</b> | -0.33<br>(0.68) | 0.18<br>(0.9)   | <b>9.03E-06</b> | <b>0.0002</b> |  | 0.075         | -0.33<br>(1.12) | 0.286    | -0.48<br>(0.66) | 0.9952   |
| histidine                                            | Histidine Metabolism                                 | -1.27<br>(1.33) | 0.19<br>(1.03) | <b>7.41E-11</b> | -1.53<br>(1.5)  | 0.26<br>(1.32)  | <b>6.33E-11</b> | <b>0.039</b>  |  | 0.0869        | -0.14<br>(1.34) | 1.85E-08 | -1.53<br>(1.33) | 0.4164   |
| alpha-ketoglutarate                                  | TCA Cycle                                            | 1.06<br>(1.27)  | 0.25<br>(1.18) | <b>3.44E-07</b> | 1.05<br>(1.31)  | 0.25<br>(1.44)  | <b>0.0001</b>   | <b>0.0274</b> |  | 0.1066        | 1.02<br>(0.7)   | 0.0712   | 1.13<br>(1.18)  | 0.7675   |
| oleoyl ethanolamide                                  | Endocannabinoid                                      | 1.57<br>(0.85)  | 0.38<br>(1.19) | <b>5.06E-10</b> | 1.17<br>(1.13)  | 0.04<br>(1.13)  | <b>3.47E-09</b> | <b>0.0001</b> |  | 0.177         | 1.45<br>(1.08)  | 0.6262   | 0.95<br>(0.97)  | 8.56E-08 |
| glycerate                                            | Glycolysis, Gluconeogenesis, and Pyruvate Metabolism | -0.72<br>(0.99) | 0.48<br>(1.15) | <b>1.88E-10</b> | -0.91<br>(0.95) | -0.06<br>(1.26) | <b>2.38E-06</b> | <b>0.029</b>  |  | 0.2477        | -1<br>(1.25)    | 0.0857   | -0.57<br>(1.05) | 0.0087   |

|                                                           |                                             |                 |                 |                 |                 |                |                 |               |                 |        |                 |          |                 |          |
|-----------------------------------------------------------|---------------------------------------------|-----------------|-----------------|-----------------|-----------------|----------------|-----------------|---------------|-----------------|--------|-----------------|----------|-----------------|----------|
| C-glycosyltryptophan                                      | Tryptophan Metabolism                       | 1.2<br>(0.75)   | 0.17<br>(0.92)  | <b>3.47E-11</b> | 1.31<br>(0.81)  | 0.24<br>(1.15) | <b>3.97E-09</b> | <b>0.0062</b> |                 | 0.3142 | 0.24<br>(0.97)  | 6.11E-12 | 1.27<br>(0.94)  | 0.5221   |
| N-acetylserine                                            | Glycine, Serine and Threonine Metabolism    | 1.49<br>(1.04)  | 0.09<br>(0.93)  | <b>2.19E-12</b> | 1.54<br>(1.08)  | 0.37<br>(1.18) | <b>3.28E-08</b> | <b>0.0271</b> |                 | 0.3199 | 0.76<br>(1.05)  | 5.36E-06 | 1.41<br>(1.17)  | 0.5923   |
| N-acetylvaline                                            | Leucine, Isoleucine and Valine Metabolism   | 0.96<br>(0.82)  | 0.1<br>(1.11)   | <b>1.33E-08</b> | 1.01<br>(0.69)  | 0.26<br>(0.98) | <b>1.24E-07</b> | <b>0.0397</b> |                 | 0.3923 | 0.86<br>(0.75)  | 0.2182   | 0.91<br>(0.89)  | 0.5789   |
| behenoyl sphingomyelin (d18:1/22:0)*                      | Sphingomyelins                              | -0.68<br>(0.67) | 0.34<br>(0.98)  | <b>2.37E-11</b> | -0.47<br>(0.63) | 0.19<br>(1.06) | <b>4.16E-06</b> | <b>0.0049</b> |                 | 0.4009 | -0.1<br>(0.67)  | 1.62E-06 | -0.65<br>(0.78) | 0.0769   |
| N-acetylalanine                                           | Alanine and Aspartate Metabolism            | 1.1<br>(0.95)   | 0.15<br>(0.94)  | <b>1.52E-10</b> | 1.18<br>(0.79)  | 0.28<br>(1.17) | <b>5.16E-07</b> | <b>0.0423</b> |                 | 0.5963 | 0.8<br>(0.89)   | 0.0025   | 1<br>(0.95)     | 0.249    |
| tryptophan                                                | Tryptophan Metabolism                       | -0.44<br>(0.87) | 0.22<br>(1.12)  | <b>9.54E-05</b> | -0.48<br>(0.91) | 0.22<br>(1.31) | <b>0.0001</b>   | <b>0.0405</b> |                 | 0.6793 | 0.05<br>(0.98)  | 0.0003   | -0.28<br>(1.07) | 0.0634   |
| <b>Significant versus HC but dependent on confounders</b> |                                             |                 |                 |                 |                 |                |                 |               |                 |        |                 |          |                 |          |
| 1-linoleoyl-GPC (18:2)                                    | Lysophospholipid                            | -0.92<br>(0.68) | 0.16<br>(1.2)   | <b>1.95E-09</b> | -0.86<br>(0.68) | 0.28<br>(1.2)  | <b>1.09E-09</b> | 0.0662        | Age             | 0.7221 | -0.7<br>(1.04)  | 0.1358   | -1.07<br>(1.05) | 0.0082   |
| citrate                                                   | TCA Cycle                                   | 1.58<br>(1.13)  | -0.01<br>(1.15) | <b>2.63E-12</b> | 1.33<br>(1.15)  | 0.41<br>(1.12) | <b>6.09E-06</b> | 0.0775        | PDE5 inhibitors | 0.0486 | 1.1<br>(1.18)   | 0.038    | 0.93<br>(1.24)  | 5.14E-06 |
| 1-palmitoyl-GPC (16:0)                                    | Lysophospholipid                            | -0.84<br>(0.64) | 0.24<br>(1.08)  | <b>8.40E-11</b> | -0.9<br>(0.74)  | 0.21<br>(1.29) | <b>1.37E-09</b> | 0.0972        | Bilirubin       | 0.0031 | -0.13<br>(0.78) | 5.49E-10 | -0.69<br>(0.91) | 0.0722   |
| malate                                                    | TCA Cycle                                   | 1.34<br>(0.8)   | 0<br>(1.37)     | <b>3.98E-11</b> | 1.31<br>(0.88)  | 0.35<br>(0.83) | <b>6.46E-10</b> | 0.1074        | Age             | 0.013  | 0.53<br>(0.81)  | 3.46E-09 | 1.32<br>(0.93)  | 0.9231   |
| 4-acetamidobutanoate                                      | Polyamine Metabolism                        | 1.57<br>(1.2)   | 0.14<br>(0.98)  | <b>7.11E-13</b> | 1.58<br>(1.13)  | 0.28<br>(1.22) | <b>2.32E-09</b> | 0.1192        | Age             | 0.6594 | 0.35<br>(1.73)  | 5.58E-07 | 1.63<br>(1.22)  | 0.4758   |
| erythronate*                                              | Aminosugar Metabolism                       | 0.89<br>(0.79)  | 0.11<br>(0.94)  | <b>3.97E-07</b> | 1.07<br>(0.77)  | 0.25<br>(1.21) | <b>2.47E-06</b> | 0.1233        | Diuretics       | 0.7631 | 0.58<br>(1.04)  | 0.0077   | 0.94<br>(0.99)  | 0.7118   |
| leucine                                                   | Leucine, Isoleucine and Valine Metabolism   | -0.59<br>(1.09) | 0.15<br>(1.02)  | <b>0.0001</b>   | -0.54<br>(1.02) | 0.27<br>(1.23) | <b>3.20E-05</b> | 0.1256        | Gender          | 0.3889 | 0.35<br>(0.99)  | 7.31E-08 | -0.59<br>(1.01) | 0.9785   |
| 1-stearoyl-2-linoleoyl-GPC (18:0/18:2)*                   | Phosphatidylcholine (PC)                    | -0.78<br>(0.9)  | 0.11<br>(1.1)   | <b>7.41E-07</b> | -0.64<br>(0.87) | 0.32<br>(1.17) | <b>4.07E-07</b> | 0.1405        | Statins         | 0.0817 | -0.33<br>(0.63) | 0.0006   | -0.59<br>(1.05) | 0.2836   |
| arginine                                                  | Urea cycle; Arginine and Proline Metabolism | -1.16<br>(1.05) | 0.22<br>(1.2)   | <b>2.79E-11</b> | -1.11<br>(0.82) | 0.26<br>(1.19) | <b>1.02E-12</b> | 0.1406        | Age             | 0.0507 | -0.95<br>(1.38) | 0.0765   | -1.1<br>(1.15)  | 0.9618   |
| 1-stearoyl-GPC (18:0)                                     | Lysophospholipid                            | -0.9<br>(0.63)  | 0.21<br>(1.18)  | <b>2.05E-09</b> | -0.84<br>(0.73) | 0.24<br>(1.24) | <b>4.38E-09</b> | 0.1595        | Bilirubin       | 0.1739 | -0.18<br>(0.92) | 1.25E-07 | -0.73<br>(0.84) | 0.2863   |
| homoarginine                                              | Urea cycle; Arginine and Proline Metabolism | -0.8<br>(1.11)  | 0.24<br>(1.13)  | <b>8.63E-08</b> | -1.18<br>(1.04) | 0.23<br>(1.46) | <b>9.63E-10</b> | 0.1746        | Age             | 0.8135 | 0.1<br>(1.1)    | 5.25E-09 | -0.99<br>(1.14) | 0.8129   |



|                                    |                                                  |                 |                |                 |                 |                |                 |        |              |        |                 |          |                 |          |
|------------------------------------|--------------------------------------------------|-----------------|----------------|-----------------|-----------------|----------------|-----------------|--------|--------------|--------|-----------------|----------|-----------------|----------|
| N-acetylneuraminate                | Aminosugar Metabolism                            | 0.87<br>(0.71)  | 0.08<br>(1.14) | <b>5.10E-06</b> | 0.87<br>(0.85)  | 0.28<br>(1.03) | <b>6.04E-05</b> | 0.181  | Age          | 0.0414 | -0.08<br>(0.72) | 2.74E-13 | 0.91<br>(0.77)  | 0.7097   |
| orotidine                          | Pyrimidine Metabolism, Orotate containing        | 0.92<br>(0.72)  | 0.1<br>(1.12)  | <b>1.14E-07</b> | 1.03<br>(0.66)  | 0.27<br>(1.21) | <b>2.56E-06</b> | 0.2776 | Gender       | 0.19   | 0.45<br>(0.98)  | 1.10E-05 | 1.1<br>(0.82)   | 0.0021   |
| N6-carbamoylthreonyladenosine      | Purine Metabolism, Adenine containing            | 1.35<br>(1.01)  | 0.14<br>(1.06) | <b>1.54E-12</b> | 1.43<br>(0.89)  | 0.32<br>(1.3)  | <b>1.18E-09</b> | 0.2958 | Age          | 0.1371 | 1.11<br>(0.84)  | 0.0028   | 1.32<br>(0.89)  | 0.2009   |
| 1-(1-enyl-palmitoyl)-GPC (P-16:0)* | Lysoplasmalogen                                  | -0.51<br>(0.9)  | 0.28<br>(1.29) | <b>4.64E-05</b> | -0.63<br>(1)    | 0.18<br>(1.06) | <b>2.36E-06</b> | 0.4844 | Antidiabetic | 0.9232 | 0.02<br>(0.96)  | 9.18E-05 | -0.57<br>(0.89) | 0.6294   |
| methionine sulfoxide               | Methionine, Cysteine, SAM and Taurine Metabolism | -0.61<br>(0.84) | 0.12<br>(1.08) | <b>4.23E-06</b> | -0.61<br>(0.98) | 0.23<br>(1.27) | <b>2.27E-05</b> | 0.4864 | Gender       | 0.3433 | -0.68<br>(0.77) | 0.6097   | -0.11<br>(0.87) | 2.02E-09 |
| asparagine                         | Alanine and Aspartate Metabolism                 | -0.6<br>(0.95)  | 0.19<br>(1.12) | <b>1.02E-05</b> | -0.87<br>(0.83) | 0.2<br>(1.4)   | <b>2.87E-07</b> | 0.5035 | Age          | 0.0657 | -0.59<br>(1.05) | 0.549    | -0.87<br>(1.02) | 0.1567   |
| 1-arachidonoyl-GPC (20:4n6)*       | Lysophospholipid                                 | -0.6<br>(1.04)  | 0.12<br>(1.4)  | <b>3.57E-05</b> | -0.54<br>(1.13) | 0.25<br>(1.11) | <b>4.12E-05</b> | 0.5114 | Statins      | 0.9221 | 0.26<br>(1.04)  | 2.27E-06 | -0.85<br>(1.07) | 0.0125   |
| 3-hydroxy-3-methylglutarate        | Mevalonate Metabolism                            | 0.92<br>(0.73)  | 0.11<br>(1.11) | <b>3.50E-07</b> | 0.84<br>(0.9)   | 0.21<br>(1.13) | <b>0.0001</b>   | 0.653  | Age          | 0.5855 | 0.19<br>(0.84)  | 9.72E-09 | 0.93<br>(0.81)  | 0.5036   |
| vanillylmandelate (VMA)            | Tyrosine Metabolism                              | 1.53<br>(1.21)  | 0.01<br>(1.13) | <b>9.88E-12</b> | 1.34<br>(1.27)  | 0.4<br>(1.11)  | <b>5.16E-07</b> | 0.8066 | Age          | 0.1236 | 0.54<br>(1.08)  | 5.68E-07 | 1.31<br>(1.3)   | 0.3765   |

### Supplementary Table S2. Altered plasma metabolite profiles in CTEPH patients.

Metabolites distinguishing CTEPH from healthy and disease controls. 55 metabolites that are significantly different between CTEPH and healthy controls in a discovery and validation cohort ( $p < 1.54 \times 10^{-4}$ ) are shown. Mean values are given and the data is scaled to the healthy control group. Significance from linear regression is shown (p value), and for metabolites with  $p > 0.05$  in CTEPH HC linear regression, the significant confounder is shown. Significance is also shown for Mann Whitney U test between all CTEPH patients versus CTED and PE patients. \*probable metabolite identity, but unconfirmed (see methods). DM, diabetes; GPC, glycerophosphocholine; HC, healthy controls; DC, disease controls; BMI, body mass index; CTED, chronic thromboembolic disease; PE, pulmonary embolism.

| Metabolite                                    | Metabolite family | Metabolic pathway                                    | Effect of Age | SE   | Sig   | Effect of male sex | SE   | Sig.  | Effect of CTEPH vs HC | SE   | Sig.   |
|-----------------------------------------------|-------------------|------------------------------------------------------|---------------|------|-------|--------------------|------|-------|-----------------------|------|--------|
| N1-methylinosine                              | Nucleotide        | Purine Metabolism, (Hypo)Xanthine/Inosine containing | 0.02          | 0.01 | 0.013 | 0.31               | 0.18 | 0.086 | 2.03                  | 0.50 | 7E-05  |
| 5-methylthioadenosine (MTA)                   | Amino Acid        | Polyamine Metabolism                                 | 0.00          | 0.01 | 0.561 | 0.33               | 0.15 | 0.029 | 1.72                  | 0.42 | 5E-05  |
| N1-methyladenosine                            | Nucleotide        | Purine Metabolism, Adenine containing                | 0.01          | 0.00 | 0.05  | -0.08              | 0.13 | 0.55  | 1.48                  | 0.35 | 5E-05  |
| 7-methylguanine                               | Nucleotide        | Purine Metabolism, Guanine containing                | 0.01          | 0.01 | 0.046 | 0.24               | 0.15 | 0.114 | 1.46                  | 0.43 | 0.0007 |
| N-formylmethionine                            | Amino Acid        | Methionine, Cysteine, SAM and Taurine Metabolism     | 0.01          | 0.00 | 0.002 | 0.11               | 0.13 | 0.409 | 1.11                  | 0.36 | 0.0024 |
| N2,N2-dimethylguanosine                       | Nucleotide        | Purine Metabolism, Guanine containing                | 0.02          | 0.00 | 1E-04 | -0.07              | 0.12 | 0.55  | 1.55                  | 0.33 | 5E-06  |
| pseudouridine                                 | Nucleotide        | Pyrimidine Metabolism, Uracil containing             | 0.01          | 0.00 | 6E-04 | 0.16               | 0.13 | 0.214 | 1.10                  | 0.35 | 0.0018 |
| N-acetylmethionine                            | Amino Acid        | Methionine, Cysteine, SAM and Taurine Metabolism     | 0.00          | 0.00 | 0.375 | -0.19              | 0.14 | 0.164 | 0.84                  | 0.38 | 0.0286 |
| 1-stearoyl-2-arachidonoyl-GPC (18:0/20:4)     | Lipid             | Phosphatidylcholine (PC)                             | -0.01         | 0.00 | 0.056 | -0.08              | 0.12 | 0.528 | -1.05                 | 0.33 | 0.002  |
| 1-linoleoyl-2-arachidonoyl-GPC (18:2/20:4n6)* | Lipid             | Phosphatidylcholine (PC)                             | -0.02         | 0.00 | 7E-07 | 0.04               | 0.13 | 0.768 | -1.17                 | 0.35 | 0.001  |
| sphingomyelin (d18:1/20:0, d16:1/22:0)*       | Lipid             | Sphingomyelins                                       | 0.00          | 0.00 | 0.572 | -0.39              | 0.11 | 8E-04 | -1.26                 | 0.32 | 1E-04  |

|                                                           |                        |                                                  |       |      |       |       |      |       |       |      |        |
|-----------------------------------------------------------|------------------------|--------------------------------------------------|-------|------|-------|-------|------|-------|-------|------|--------|
| sphingomyelin<br>(d18:1/21:0, d17:1/22:0,<br>d16:1/23:0)* | Lipid                  | Sphingomyelins                                   | 0.00  | 0.00 | 0.647 | -0.57 | 0.12 | 6E-06 | -1.53 | 0.34 | 1E-05  |
| 2-hydroxypalmitate                                        | Lipid                  | Fatty Acid, Monohydroxy                          | 0.01  | 0.00 | 0.229 | -0.02 | 0.15 | 0.889 | 1.52  | 0.41 | 0.0002 |
| N-acetylphenylalanine                                     | Amino Acid             | Phenylalanine Metabolism                         | 0.00  | 0.01 | 0.898 | 0.25  | 0.16 | 0.126 | 1.03  | 0.45 | 0.0217 |
| sphingomyelin<br>(d18:1/17:0, d17:1/18:0,<br>d19:1/16:0)  | Lipid                  | Sphingomyelins                                   | 0.01  | 0.00 | 0.304 | -0.59 | 0.15 | 7E-05 | -0.92 | 0.41 | 0.0239 |
| 1,2-dilinoleoyl-GPC<br>(18:2/18:2)                        | Lipid                  | Phosphatidylcholine (PC)                         | -0.01 | 0.00 | 7E-04 | -0.12 | 0.13 | 0.34  | -1.09 | 0.36 | 0.0025 |
| gamma-glutamyl-epsilon-lysine                             | Peptide                | Gamma-glutamyl Amino Acid                        | -0.01 | 0.01 | 0.225 | 0.03  | 0.17 | 0.864 | -1.14 | 0.47 | 0.0169 |
| oxalate (ethanedioate)                                    | Cofactors and Vitamins | Ascorbate and Aldarate Metabolism                | 0.00  | 0.01 | 0.436 | -0.32 | 0.16 | 0.044 | -1.18 | 0.44 | 0.0087 |
| 1-(1-enyl-palmitoyl)-2-linoleoyl-GPC (P-16:0/18:2)*       | Lipid                  | Plasmalogen                                      | -0.01 | 0.01 | 0.024 | -0.55 | 0.16 | 5E-04 | -1.19 | 0.43 | 0.0065 |
| oleoyl ethanolamide                                       | Lipid                  | Endocannabinoid                                  | 0.00  | 0.00 | 0.395 | -0.25 | 0.14 | 0.071 | 1.50  | 0.38 | 0.0001 |
| dimethylarginine (SDMA + ADMA)                            | Amino Acid             | Urea cycle; Arginine and Proline Metabolism      | 0.02  | 0.00 | 0.001 | 0.03  | 0.14 | 0.813 | 1.45  | 0.39 | 0.0003 |
| methionine sulfone                                        | Amino Acid             | Methionine, Cysteine, SAM and Taurine Metabolism | 0.01  | 0.01 | 0.28  | -0.48 | 0.17 | 0.004 | 1.41  | 0.46 | 0.0025 |
| alpha-ketoglutarate                                       | Energy                 | TCA Cycle                                        | 0.00  | 0.01 | 0.77  | -0.20 | 0.19 | 0.3   | 1.19  | 0.54 | 0.0274 |
| kynurenine                                                | Amino Acid             | Tryptophan Metabolism                            | 0.01  | 0.01 | 0.279 | 0.26  | 0.16 | 0.098 | 1.06  | 0.44 | 0.0159 |
| C-glycosyltryptophan                                      | Amino Acid             | Tryptophan Metabolism                            | 0.02  | 0.00 | 3E-05 | -0.17 | 0.12 | 0.169 | 0.94  | 0.34 | 0.0062 |
| N-acetylserine                                            | Amino Acid             | Glycine, Serine and Threonine Metabolism         | 0.02  | 0.01 | 1E-04 | 0.11  | 0.15 | 0.473 | 0.93  | 0.42 | 0.0271 |
| N-acetylalanine                                           | Amino Acid             | Alanine and Aspartate Metabolism                 | 0.01  | 0.00 | 0.005 | 0.03  | 0.13 | 0.808 | 0.77  | 0.37 | 0.0423 |

|                                                     |              |                                                      |       |      |       |       |      |       |       |      |        |
|-----------------------------------------------------|--------------|------------------------------------------------------|-------|------|-------|-------|------|-------|-------|------|--------|
| N-acetylvaline                                      | Amino Acid   | Leucine, Isoleucine and Valine Metabolism            | 0.01  | 0.00 | 0.069 | 0.07  | 0.13 | 0.594 | 0.74  | 0.36 | 0.0397 |
| tryptophan                                          | Amino Acid   | Tryptophan Metabolism                                | -0.02 | 0.00 | 6E-07 | 0.18  | 0.13 | 0.188 | -0.76 | 0.37 | 0.0405 |
| behenoyl sphingomyelin (d18:1/22:0)*                | Lipid        | Sphingomyelins                                       | -0.01 | 0.00 | 0.013 | -0.30 | 0.11 | 0.006 | -0.86 | 0.30 | 0.0049 |
| histidine                                           | Amino Acid   | Histidine Metabolism                                 | -0.03 | 0.01 | 1E-06 | 0.05  | 0.17 | 0.769 | -1.00 | 0.48 | 0.039  |
| sphingomyelin (d18:2/23:0, d18:1/23:1, d17:1/24:1)* | Lipid        | Sphingomyelins                                       | 0.00  | 0.00 | 0.414 | -0.81 | 0.10 | 5E-15 | -1.00 | 0.27 | 0.0002 |
| glycerate                                           | Carbohydrate | Glycolysis, Gluconeogenesis, and Pyruvate Metabolism | 0.00  | 0.01 | 0.871 | -0.09 | 0.17 | 0.57  | -1.02 | 0.46 | 0.029  |
| sphingomyelin (d18:1/22:1, d18:2/22:0, d16:1/24:1)* | Lipid        | Sphingomyelins                                       | 0.00  | 0.00 | 0.636 | -0.81 | 0.11 | 2E-11 | -1.19 | 0.31 | 0.0002 |
| androsterone sulfate                                | Lipid        | Androgenic Steroids                                  | -0.02 | 0.01 | 0.003 | 0.84  | 0.17 | 3E-06 | -1.71 | 0.48 | 0.0005 |

**Supplementary Table S3 – Effect of age and sex on metabolites associated with CTEPH** Linear regression analyses were used to model age and sex effects in healthy controls and CTEPH patients correcting for CTEPH status and confounders.

| CTEPH (n=200) vs HC (n=121) |                                                     | 95% Confidence       |             | Sig.     | Best cut-off | Sensitivity | Specificity |
|-----------------------------|-----------------------------------------------------|----------------------|-------------|----------|--------------|-------------|-------------|
| Test Result                 | Variable(s)                                         | Area Under the Curve | Interval    |          |              |             |             |
|                             |                                                     |                      | Lower Upper |          |              |             |             |
|                             | 7-methylguanine                                     | 0.812                | 0.766 0.858 | 7.94E-21 | 0.83         | 0.68        | 0.818       |
|                             | N-formylmethionine                                  | 0.878                | 0.84 0.916  | 8.1E-30  | 0.94         | 0.815       | 0.843       |
|                             | N1-methyladenosine                                  | 0.909                | 0.875 0.943 | 1.12E-34 | 1.14         | 0.785       | 0.901       |
|                             | N1-methylinosine                                    | 0.871                | 0.831 0.911 | 7.68E-29 | 1.29         | 0.745       | 0.95        |
|                             | 5-methylthioadenosine (MTA)                         | 0.904                | 0.87 0.937  | 7.99E-34 | 0.89         | 0.87        | 0.868       |
|                             | 1-stearoyl-2-arachidonoyl-GPC (18:0/20:4)           | 0.356                | 0.291 0.421 | 1.5E-05  | 0.44         | 0.92        | 0.347       |
|                             | 1-linoleoyl-2-arachidonoyl-GPC (18:2/20:4n6)*       | 0.291                | 0.229 0.354 | 3.8E-10  | 0.08         | 0.84        | 0.521       |
|                             | sphingomyelin (d18:1/21:0, d17:1/22:0, d16:1/23:0)* | 0.31                 | 0.251 0.369 | 1.17E-08 | -0.51        | 0.565       | 0.752       |
|                             | sphingomyelin (d18:1/20:0, d16:1/22:0)*             | 0.308                | 0.248 0.368 | 7.73E-09 | -0.43        | 0.63        | 0.669       |
|                             | N-acetylmethionine                                  | 0.864                | 0.825 0.904 | 7.01E-28 | 0.83         | 0.79        | 0.851       |
|                             | pseudouridine                                       | 0.92                 | 0.89 0.95   | 1.6E-36  | 0.83         | 0.885       | 0.826       |
|                             | N2,N2-dimethylguanosine                             | 0.936                | 0.908 0.963 | 4.03E-39 | 1.35         | 0.835       | 0.942       |

| CTEPH (n=200) vs DC (n=132) |                                                     | Area Under the Curve |       | 95% Confidence Interval |          | Sig.  | Best cut-off | Sensitivity | Specificity |
|-----------------------------|-----------------------------------------------------|----------------------|-------|-------------------------|----------|-------|--------------|-------------|-------------|
| Test Result                 | Variable(s)                                         |                      | Lower | Upper                   |          |       |              |             |             |
|                             | 7-methylguanine                                     | 0.718                | 0.663 | 0.774                   | 1.63E-11 | 0.74  | 0.705        | 0.682       |             |
|                             | N-formylmethionine                                  | 0.746                | 0.689 | 0.803                   | 2.96E-14 | 0.94  | 0.815        | 0.636       |             |
|                             | N1-methyladenosine                                  | 0.76                 | 0.706 | 0.815                   | 1E-15    | 1.14  | 0.785        | 0.659       |             |
|                             | N1-methylinosine                                    | 0.731                | 0.674 | 0.787                   | 1.14E-12 | 1.65  | 0.69         | 0.735       |             |
|                             | 5-methylthioadenosine (MTA)                         | 0.732                | 0.675 | 0.79                    | 7.63E-13 | 1.16  | 0.81         | 0.614       |             |
|                             | 1-stearoyl-2-arachidonoyl-GPC (18:0/20:4)           | 0.349                | 0.286 | 0.411                   | 3.1E-06  | -0.13 | 0.72         | 0.553       |             |
|                             | 1-linoleoyl-2-arachidonoyl-GPC (18:2/20:4n6)*       | 0.384                | 0.319 | 0.449                   | 0.000333 | -0.46 | 0.585        | 0.652       |             |
|                             | sphingomyelin (d18:1/21:0, d17:1/22:0, d16:1/23:0)* | 0.417                | 0.353 | 0.481                   | 0.010438 | -0.05 | 0.74         | 0.439       |             |
|                             | sphingomyelin (d18:1/20:0, d16:1/22:0)*             | 0.416                | 0.351 | 0.481                   | 0.009658 | -0.21 | 0.695        | 0.5         |             |
|                             | N-acetylmethionine                                  | 0.739                | 0.682 | 0.795                   | 1.74E-13 | 0.83  | 0.79         | 0.636       |             |
|                             | pseudouridine                                       | 0.73                 | 0.67  | 0.789                   | 1.45E-12 | 0.97  | 0.86         | 0.568       |             |
|                             | N2,N2-dimethylguanosine                             | 0.769                | 0.713 | 0.825                   | 1.16E-16 | 1.35  | 0.835        | 0.682       |             |

**Supplementary Table S4 – ROC analysis and best cut-offs for metabolites which distinguish CTEPH from healthy and disease controls and CTED patients.** Best cut-offs derived using the Youden Index of specificity+sensitivity. Areas under the curve below 0.5 indicate that lower levels of the metabolite are associated with CTEPH – comparable AUCs can be calculated by subtracting these from 1.

| Metabolite                                             | Super metabolic pathway | Sub metabolic pathway                            | CTEPH operable | CTEPH-PostPEA | Sig.   | Paired CTEPH, pre-PEA | Paired CTEPH, post-PEA | Sig.   | q FDR         |
|--------------------------------------------------------|-------------------------|--------------------------------------------------|----------------|---------------|--------|-----------------------|------------------------|--------|---------------|
| sphingomyelin (d18:1/22:1, d18:2/22:0, d16:1/24:1)*    | Lipid                   | Sphingomyelins                                   | -0.85 (0.88)   | -0.59 (0.87)  | 0.043  | -0.84                 | -0.38                  | 0.0002 | <b>0.0075</b> |
| taurine                                                | Amino Acid              | Methionine, Cysteine, SAM and Taurine Metabolism | -0.35 (0.9)    | -0.01 (1.12)  | 0.0407 | 0.43                  | -0.22                  | 0.0007 | <b>0.0131</b> |
| sphingomyelin (d18:1/14:0, d16:1/16:0)*                | Lipid                   | Sphingomyelins                                   | -0.45 (0.63)   | -0.16 (0.67)  | 0.0064 | -0.61                 | -0.31                  | 0.0014 | <b>0.0133</b> |
| 3-ureidopropionate                                     | Nucleotide              | Pyrimidine Metabolism, Uracil containing         | 0.22 (1.56)    | -0.03 (1.15)  | 0.038  | 1.20                  | 0.74                   | 0.0014 | <b>0.0133</b> |
| alpha-tocopherol                                       | Cofactors and Vitamins  | Tocopherol Metabolism                            | 0.29 (1.02)    | 0.62 (1.19)   | 0.05   | 0.12                  | 0.65                   | 0.0035 | <b>0.0257</b> |
| N2,N2-dimethylguanosine                                | Nucleotide              | Purine Metabolism, Guanine containing            | 1.95 (0.8)     | 1.68 (0.79)   | 0.0312 | 2.17                  | 1.85                   | 0.0045 | <b>0.0278</b> |
| beta-hydroxyisovalerate                                | Amino Acid              | Leucine, Isoleucine and Valine Metabolism        | 0.47 (1.29)    | -0.07 (1.11)  | 0.0065 | 0.33                  | -0.12                  | 0.009  | <b>0.0478</b> |
| sphingomyelin (d18:1/21:0, d17:1/22:0, d16:1/23:0)*    | Lipid                   | Sphingomyelins                                   | -0.75 (0.79)   | -0.39 (0.88)  | 0.0277 | -1.04                 | -0.65                  | 0.0122 | 0.05          |
| cholesterol                                            | Lipid                   | Sterol                                           | -0.19 (1.19)   | 0.24 (1.14)   | 0.013  | -0.45                 | 0.00                   | 0.0133 | 0.05          |
| 1-palmitoyl-2-stearoyl-GPC (16:0/18:0)                 | Lipid                   | Phosphatidylcholine (PC)                         | 0.14 (0.89)    | 0.57 (1.12)   | 0.0129 | 0.45                  | 0.03                   | 0.0138 | 0.05          |
| 1,2-dipalmitoyl-GPC (16:0/16:0)                        | Lipid                   | Phosphatidylcholine (PC)                         | -0.16 (1.01)   | 0.27 (1.17)   | 0.0236 | 0.87                  | 0.53                   | 0.0162 | 0.05          |
| 1-(1-enyl-palmitoyl)-2-arachidonoyl-GPE (P-16:0/20:4)* | Lipid                   | Plasmalogen                                      | -0.08 (1.09)   | 0.3 (1.05)    | 0.0282 | -0.02                 | -0.42                  | 0.0379 | 0.12          |
| 1-(1-enyl-palmitoyl)-GPE (P-16:0)*                     | Lipid                   | Lysoplasmalogen                                  | -0.18 (1.04)   | 0.22 (0.97)   | 0.0219 | -0.03                 | -0.38                  | 0.06   | 0.18          |
| 1-(1-enyl-stearoyl)-2-arachidonoyl-GPE (P-18:0/20:4)*  | Lipid                   | Plasmalogen                                      | -0.21 (0.88)   | 0.18 (0.94)   | 0.0104 | -0.17                 | -0.46                  | 0.07   | 0.19          |
| N-acetyltryptophan                                     | Amino Acid              | Tryptophan Metabolism                            | 0.72 (1.11)    | 0.16 (1.06)   | 0.004  | 0.59                  | 0.32                   | 0.08   | 0.19          |
| N-acetylneuraminate                                    | Carbohydrate            | Aminosugar Metabolism                            | 0.65 (0.82)    | 0.91 (0.79)   | 0.0451 | 0.90                  | 0.66                   | 0.08   | 0.19          |
| 1-(1-enyl-palmitoyl)-2-oleoyl-GPE (P-16:0/18:1)*       | Lipid                   | Plasmalogen                                      | -0.01 (1.05)   | 0.29 (1.01)   | 0.0289 | -0.01                 | -0.37                  | 0.09   | 0.19          |
| behenoyl sphingomyelin (d18:1/22:0)*                   | Lipid                   | Sphingomyelins                                   | -0.6 (0.67)    | -0.38 (0.76)  | 0.05   | -0.65                 | -0.45                  | 0.09   | 0.19          |
| thyroxine                                              | Amino Acid              | Tyrosine Metabolism                              | -0.33 (1.17)   | 0.1 (1.32)    | 0.0416 | -0.10                 | 0.17                   | 0.11   | 0.19          |

|                                              |                        |                                                  |              |              |        |       |       |      |      |
|----------------------------------------------|------------------------|--------------------------------------------------|--------------|--------------|--------|-------|-------|------|------|
| cysteine-glutathione disulfide               | Amino Acid             | Glutathione Metabolism                           | 0.11 (1.52)  | 0.91 (1.45)  | 0.0026 | -0.10 | 0.37  | 0.11 | 0.19 |
| alpha-ketoglutarate                          | Energy                 | TCA Cycle                                        | 1.16 (1.07)  | 0.48 (1.37)  | 0.0038 | 1.01  | 1.37  | 0.11 | 0.19 |
| 1-(1-enyl-oleoyl)-GPE (P-18:1)*              | Lipid                  | Lysoplasmalogen                                  | -0.13 (0.95) | 0.26 (0.89)  | 0.009  | 0.05  | -0.21 | 0.13 | 0.22 |
| 5,6-dihydrothymine                           | Nucleotide             | Pyrimidine Metabolism, Thymine containing        | 0.95 (1.04)  | 0.62 (1.21)  | 0.042  | 1.52  | 1.29  | 0.14 | 0.23 |
| 1-(1-enyl-stearoyl)-GPE (P-18:0)*            | Lipid                  | Lysoplasmalogen                                  | -0.45 (1.07) | 0.06 (0.96)  | 0.003  | -0.19 | -0.45 | 0.16 | 0.24 |
| N-acetylphenylalanine                        | Amino Acid             | Phenylalanine Metabolism                         | 1.04 (0.99)  | 0.73 (1.05)  | 0.0242 | 1.17  | 1.02  | 0.17 | 0.24 |
| palmitoyl dihydrosphingomyelin (d18:0/16:0)* | Lipid                  | Dihydrosphingomyelins                            | -0.61 (0.98) | -0.24 (1.09) | 0.0115 | -0.49 | -0.28 | 0.17 | 0.24 |
| cysteine s-sulfate                           | Amino Acid             | Methionine, Cysteine, SAM and Taurine Metabolism | 0.44 (1.25)  | 0.1 (1.2)    | 0.0409 | -1.16 | -0.89 | 0.18 | 0.25 |
| palmitoyl sphingomyelin (d18:1/16:0)         | Lipid                  | Sphingomyelins                                   | -0.3 (1.04)  | 0 (1.06)     | 0.0493 | -0.17 | -0.01 | 0.29 | 0.38 |
| glucuronate                                  | Carbohydrate           | Aminosugar Metabolism                            | 0.51 (0.96)  | 0.07 (1.06)  | 0.0106 | 0.66  | 0.51  | 0.30 | 0.38 |
| 1-methylnicotinamide                         | Cofactors and Vitamins | Nicotinate and Nicotinamide Metabolism           | -0.4 (0.9)   | 0.07 (0.82)  | 0.0016 | -0.03 | -0.20 | 0.33 | 0.40 |
| glycerophosphoethanolamine                   | Lipid                  | Phospholipid Metabolism                          | 0.07 (1)     | 0.39 (1.01)  | 0.0432 | 0.08  | -0.08 | 0.36 | 0.43 |
| imidazole propionate                         | Amino Acid             | Histidine Metabolism                             | 1.03 (0.92)  | 0.2 (1.58)   | 0.0007 | 0.49  | 0.64  | 0.37 | 0.43 |
| glycoursodeoxycholate                        | Lipid                  | Secondary Bile Acid Metabolism                   | 0.28 (1.15)  | -0.27 (1.15) | 0.0077 | 0.09  | 0.25  | 0.40 | 0.44 |
| cysteine                                     | Amino Acid             | Methionine, Cysteine, SAM and Taurine Metabolism | -0.56 (1.36) | -0.13 (1.35) | 0.0151 | -1.15 | -1.29 | 0.58 | 0.64 |
| N-acetylglutamate                            | Amino Acid             | Glutamate Metabolism                             | 0.52 (0.52)  | 0.31 (0.52)  | 0.0242 | 0.58  | 0.54  | 0.61 | 0.65 |
| 1-stearoyl-GPE (18:0)                        | Lipid                  | Lysophospholipid                                 | -0.33 (0.94) | -0.03 (0.92) | 0.0405 | -0.26 | -0.23 | 0.82 | 0.84 |
| 2-hydroxy-3-methylvalerate                   | Amino Acid             | Leucine, Isoleucine and Valine Metabolism        | 0.52 (1.05)  | 0.07 (1.32)  | 0.0493 | 0.15  | 0.16  | 0.96 | 0.96 |

### Supplementary Table S5. Changes in metabolomic profile pre- and post-PEA.

Metabolites different between patients with operable CTEPH sampled before surgery and patients sampled post-PEA surgery. Median metabolite levels (z-scores relative to healthy controls) are shown for independent patients before or after PEA surgery, and for a group of 43 patients sampled before and after surgery. Significance shown is for Mann Whitney U tests or paired t-tests, as appropriate. FDR, false discovery rate corrected p-value



| Biochemical                                 | Sub-pathway                                          | Super-pathway          | Gradients |             |        |             |        |             |
|---------------------------------------------|------------------------------------------------------|------------------------|-----------|-------------|--------|-------------|--------|-------------|
|                                             |                                                      |                        | PA-ART.   |             | SVC-PA |             | PA-SVC |             |
|                                             |                                                      |                        | FC        | FDR p-value | FC     | FDR p-value | FC     | FDR p-value |
| Gradients across all sampling sites         |                                                      |                        |           |             |        |             |        |             |
| 1-methylnicotinamide                        | Nicotinate and Nicotinamide Metabolism               | Cofactors and Vitamins | 0.151     | 6.3668E-06  | -0.23  | 4.8183E-09  | -0.079 | 0.02913395  |
| malate                                      | TCA Cycle                                            | Energy                 | -0.239    | 9.3537E-05  | -0.264 | 2.5687E-10  | -0.503 | 5.9814E-12  |
| alpha-ketoglutarate                         | TCA Cycle                                            | Energy                 | -0.184    | 0.00025164  | -0.269 | 8.8517E-08  | -0.453 | 1.8931E-09  |
| arachidonate (20:4n6)                       | Polyunsaturated Fatty Acid (n3 and n6)               | Lipid                  | -0.241    | 0.00052156  | -0.171 | 0.00067213  | -0.413 | 1.1959E-08  |
| 2-hydroxybutyrate/2-hydroxyisobutyrate      | Glutathione Metabolism                               | Amino Acid             | 0.073     | 0.00091228  | 0.08   | 0.00298024  | 0.153  | 1.6462E-06  |
| glutamate                                   | Glutamate Metabolism                                 | Amino Acid             | -0.239    | 0.00122588  | 0.998  | 7.0141E-12  | 0.759  | 3.1009E-10  |
| ornithine                                   | Urea cycle; Arginine and Proline Metabolism          | Amino Acid             | 0.142     | 0.0035656   | 0.116  | 0.00596847  | 0.258  | 5.1913E-07  |
| glucose                                     | Glycolysis, Gluconeogenesis, and Pyruvate Metabolism | Carbohydrate           | -0.115    | 0.00646371  | 0.198  | 3.8473E-06  | 0.083  | 0.04600271  |
| eicosapentaenoate (EPA; 20:5n3)             | Polyunsaturated Fatty Acid (n3 and n6)               | Lipid                  | -0.127    | 0.01166334  | -0.138 | 7.3513E-05  | -0.265 | 6.6222E-08  |
| dihomo-linolenate (20:3n3 or n6)            | Polyunsaturated Fatty Acid (n3 and n6)               | Lipid                  | -0.151    | 0.02202636  | -0.142 | 0.00081195  | -0.293 | 1.6462E-06  |
| fumarate                                    | TCA Cycle                                            | Energy                 | -0.145    | 0.03812286  | -0.346 | 2.1222E-09  | -0.492 | 5.15E-09    |
| stearidonate (18:4n3)                       | Polyunsaturated Fatty Acid (n3 and n6)               | Lipid                  | 0.078     | 0.04989586  | -0.154 | 3.2923E-07  | -0.076 | 0.00224968  |
| Gradients between PA-ART and SVC-PA samples |                                                      |                        |           |             |        |             |        |             |
| S-1-pyrroline-5-carboxylate                 | Glutamate Metabolism                                 | Amino Acid             | -0.261    | 1.6353E-05  | 0.235  | 0.0004531   |        |             |

|                                                     |                                                            |                           |        |            |        |            |        |            |
|-----------------------------------------------------|------------------------------------------------------------|---------------------------|--------|------------|--------|------------|--------|------------|
| citrate                                             | TCA Cycle                                                  | Energy                    | 0.284  | 0.00021356 | -0.32  | 1.9078E-07 |        |            |
| hypoxanthine                                        | Purine Metabolism,<br>(Hypo)Xanthine/Inosine<br>containing | Nucleotide                | 0.246  | 0.0003471  | -0.227 | 0.00025109 |        |            |
| 4-hydroxyphenylpyruvate                             | Tyrosine Metabolism                                        | Amino Acid                | 0.238  | 0.00067592 | -0.132 | 0.01580435 |        |            |
| aspartate                                           | Alanine and Aspartate<br>Metabolism                        | Amino Acid                | -0.318 | 0.00251419 | 0.404  | 2.3314E-05 |        |            |
| methionine sulfoxide                                | Methionine, Cysteine,<br>SAM and Taurine<br>Metabolism     | Amino Acid                | -0.143 | 0.00576202 | 0.08   | 0.04780915 |        |            |
| mannose                                             | Fructose, Mannose and<br>Galactose Metabolism              | Carbohydrate              | -0.089 | 0.03252006 | 0.128  | 0.00201883 |        |            |
| N-acetylmethionine                                  | Methionine, Cysteine,<br>SAM and Taurine<br>Metabolism     | Amino Acid                | 0.087  | 0.03793341 | -0.152 | 2.6986E-06 |        |            |
| <b>Gradients between PA-ART and ART-SVC samples</b> |                                                            |                           |        |            |        |            |        |            |
| palmitoylcholine                                    | Fatty Acid Metabolism<br>(Acyl Choline)                    | Lipid                     | -0.803 | 2.3129E-09 |        |            | -0.927 | 2.1208E-10 |
| glycerophosphorylcholine (GPC)                      | Phospholipid Metabolism                                    | Lipid                     | -0.721 | 6.4598E-09 |        |            | -0.787 | 2.0185E-10 |
| sarcosine                                           | Glycine, Serine and<br>Threonine Metabolism                | Amino Acid                | 0.631  | 1.8199E-08 |        |            | 0.713  | 1.8931E-09 |
| erythronate*                                        | Aminosugar Metabolism                                      | Carbohydrate              | -0.29  | 3.0496E-08 |        |            | -0.286 | 5.15E-09   |
| 3-hydroxy-3-methylglutarate                         | Mevalonate Metabolism                                      | Lipid                     | -0.378 | 3.9233E-08 |        |            | -0.426 | 2.8368E-10 |
| 1-(1-enyl-palmitoyl)-GPE (P-16:0)*                  | Lysoplasmalogen                                            | Lipid                     | -0.681 | 1.3054E-06 |        |            | -0.604 | 5.7047E-05 |
| glycerophosphoethanolamine                          | Phospholipid Metabolism                                    | Lipid                     | -0.646 | 1.3149E-06 |        |            | -0.499 | 0.00016003 |
| oxalate (ethanedioate)                              | Ascorbate and Aldarate<br>Metabolism                       | Cofactors<br>and Vitamins | -0.288 | 1.3149E-06 |        |            | -0.282 | 6.2582E-06 |
| glycerate                                           | Glycolysis,<br>Gluconeogenesis, and<br>Pyruvate Metabolism | Carbohydrate              | -0.36  | 2.363E-06  |        |            | -0.403 | 3.3828E-07 |
| 1-stearoyl-GPE (18:0)                               | Lysophospholipid                                           | Lipid                     | -0.416 | 6.3668E-06 |        |            | -0.337 | 0.0007122  |

|                                             |                                                  |                        |        |            |  |  |        |            |
|---------------------------------------------|--------------------------------------------------|------------------------|--------|------------|--|--|--------|------------|
| 1-linoleoyl-GPC (18:2)                      | Lysophospholipid                                 | Lipid                  | -0.396 | 1.3154E-05 |  |  | -0.387 | 6.2582E-06 |
| hypotaurine                                 | Methionine, Cysteine, SAM and Taurine Metabolism | Amino Acid             | -0.485 | 1.5989E-05 |  |  | -0.557 | 8.8499E-07 |
| threonate                                   | Ascorbate and Aldarate Metabolism                | Cofactors and Vitamins | -0.381 | 1.5989E-05 |  |  | -0.34  | 8.1514E-06 |
| 1-(1-enyl-stearoyl)-GPE (P-18:0)*           | Lysoplasmalogen                                  | Lipid                  | -0.569 | 1.9284E-05 |  |  | -0.437 | 0.00166427 |
| 1-oleoyl-GPC (18:1)                         | Lysophospholipid                                 | Lipid                  | -0.392 | 2.685E-05  |  |  | -0.356 | 3.4486E-05 |
| myo-inositol                                | Inositol Metabolism                              | Lipid                  | -0.318 | 3.0697E-05 |  |  | -0.347 | 4.7834E-07 |
| 1-arachidonoyl-GPC (20:4n6)*                | Lysophospholipid                                 | Lipid                  | -0.491 | 3.4957E-05 |  |  | -0.501 | 6.9484E-06 |
| 1-linolenoyl-GPC (18:3)*                    | Lysophospholipid                                 | Lipid                  | -0.27  | 3.7291E-05 |  |  | -0.269 | 5.1503E-05 |
| 1-(1-enyl-oleoyl)-GPE (P-18:1)*             | Lysoplasmalogen                                  | Lipid                  | -0.578 | 4.0065E-05 |  |  | -0.529 | 0.00077158 |
| glucuronate                                 | Aminosugar Metabolism                            | Carbohydrate           | -0.279 | 8.7596E-05 |  |  | -0.324 | 6.1505E-06 |
| cysteine s-sulfate                          | Methionine, Cysteine, SAM and Taurine Metabolism | Amino Acid             | 0.412  | 9.3537E-05 |  |  | 0.428  | 7.5481E-05 |
| phenol sulfate                              | Tyrosine Metabolism                              | Amino Acid             | 0.058  | 9.6634E-05 |  |  | 0.071  | 4.0266E-05 |
| 1-stearoyl-GPI (18:0)                       | Lysophospholipid                                 | Lipid                  | -0.546 | 0.00014489 |  |  | -0.54  | 3.11E-05   |
| 3-methylhistidine                           | Histidine Metabolism                             | Amino Acid             | 0.106  | 0.0001818  |  |  | 0.095  | 9.5465E-05 |
| taurine                                     | Methionine, Cysteine, SAM and Taurine Metabolism | Amino Acid             | -0.527 | 0.00021015 |  |  | -0.394 | 0.01136516 |
| 1-palmitoyl-2-palmitoleoyl-GPC (16:0/16:1)* | Phosphatidylcholine (PC)                         | Lipid                  | 0.134  | 0.00036363 |  |  | 0.128  | 6.2582E-06 |
| arabonate/xylonate                          | Pentose Metabolism                               | Carbohydrate           | -0.28  | 0.00039401 |  |  | -0.333 | 6.6796E-07 |
| 1-palmitoleoyl-GPC (16:1)*                  | Lysophospholipid                                 | Lipid                  | -0.23  | 0.00039401 |  |  | -0.168 | 0.00334584 |
| 1-arachidonoyl-GPI (20:4)*                  | Lysophospholipid                                 | Lipid                  | -0.457 | 0.00041187 |  |  | -0.519 | 3.826E-06  |
| phosphoethanolamine                         | Phospholipid Metabolism                          | Lipid                  | -0.469 | 0.00067592 |  |  | -0.322 | 0.02584305 |
| cysteine-glutathione disulfide              | Glutathione Metabolism                           | Amino Acid             | 0.211  | 0.00067592 |  |  | 0.157  | 0.02344767 |

|                                                        |                                                            |                           |        |            |  |  |        |            |
|--------------------------------------------------------|------------------------------------------------------------|---------------------------|--------|------------|--|--|--------|------------|
| 1-stearoyl-GPC (18:0)                                  | Lysophospholipid                                           | Lipid                     | -0.269 | 0.00087333 |  |  | -0.261 | 7.5481E-05 |
| adenosine 5'-monophosphate (AMP)                       | Purine Metabolism,<br>Adenine containing                   | Nucleotide                | -0.301 | 0.0016345  |  |  | -0.4   | 0.00024698 |
| ribonate                                               | Pentose Metabolism                                         | Carbohydrate              | -0.254 | 0.00171284 |  |  | -0.195 | 0.01520143 |
| 2-hydroxypalmitate                                     | Fatty Acid, Monohydroxy                                    | Lipid                     | -0.304 | 0.00174563 |  |  | -0.414 | 6.2582E-06 |
| N-acetylneuraminate                                    | Aminosugar Metabolism                                      | Carbohydrate              | -0.297 | 0.0019371  |  |  | -0.233 | 0.03142122 |
| 1-oleoyl-GPE (18:1)                                    | Lysophospholipid                                           | Lipid                     | -0.123 | 0.00251419 |  |  | -0.085 | 0.03894162 |
| 1-(1-enyl-palmitoyl)-2-arachidonoyl-GPE (P-16:0/20:4)* | Plasmalogen                                                | Lipid                     | -0.293 | 0.00282943 |  |  | -0.212 | 0.03515882 |
| N-acetylvaline                                         | Leucine, Isoleucine and<br>Valine Metabolism               | Amino Acid                | 0.118  | 0.00282943 |  |  | 0.052  | 0.02630446 |
| 1-linoleoyl-GPI (18:2)*                                | Lysophospholipid                                           | Lipid                     | -0.325 | 0.00293949 |  |  | -0.354 | 6.3924E-05 |
| allantoin                                              | Purine Metabolism,<br>(Hypo)Xanthine/Inosine<br>containing | Nucleotide                | -0.137 | 0.00313861 |  |  | -0.117 | 0.00162672 |
| 3-carboxy-4-methyl-5-propyl-2-furanpropanoate (CMPF)   | Fatty Acid, Dicarboxylate                                  | Lipid                     | 0.046  | 0.00348162 |  |  | 0.067  | 0.00026166 |
| 1-myristoyl-2-palmitoyl-GPC (14:0/16:0)                | Phosphatidylcholine (PC)                                   | Lipid                     | 0.101  | 0.00646447 |  |  | 0.129  | 0.00018146 |
| ethylmalonate                                          | Leucine, Isoleucine and<br>Valine Metabolism               | Amino Acid                | -0.08  | 0.00737992 |  |  | -0.092 | 0.00021416 |
| asparagine                                             | Alanine and Aspartate<br>Metabolism                        | Amino Acid                | -0.139 | 0.00751376 |  |  | -0.216 | 2.7952E-05 |
| mannitol/sorbitol                                      | Fructose, Mannose and<br>Galactose Metabolism              | Carbohydrate              | -0.08  | 0.00767081 |  |  | -0.058 | 0.00654856 |
| arabitol/xylitol                                       | Pentose Metabolism                                         | Carbohydrate              | -0.1   | 0.00932002 |  |  | -0.092 | 0.00588643 |
| trigonelline (N'-methylnicotinate)                     | Nicotinate and<br>Nicotinamide Metabolism                  | Cofactors<br>and Vitamins | 0.054  | 0.01432868 |  |  | 0.049  | 0.0056586  |
| biliverdin                                             | Hemoglobin and Porphyrin<br>Metabolism                     | Cofactors<br>and Vitamins | 0.124  | 0.01824202 |  |  | 0.143  | 0.00642229 |
| 1-palmitoyl-GPC (16:0)                                 | Lysophospholipid                                           | Lipid                     | -0.236 | 0.02202636 |  |  | -0.189 | 0.03328623 |

|                                                     |                                                      |                        |        |            |        |            |        |            |
|-----------------------------------------------------|------------------------------------------------------|------------------------|--------|------------|--------|------------|--------|------------|
| 1-stearoyl-2-arachidonoyl-GPE (18:0/20:4)           | Phosphatidylethanolamine (PE)                        | Lipid                  | -0.18  | 0.02202636 |        |            | -0.149 | 0.02584305 |
| 1-palmitoyl-2-linoleoyl-GPC (16:0/18:2)             | Phosphatidylcholine (PC)                             | Lipid                  | 0.132  | 0.02921371 |        |            | 0.214  | 0.00057078 |
| N1-Methyl-2-pyridone-5-carboxamide                  | Nicotinate and Nicotinamide Metabolism               | Cofactors and Vitamins | 0.059  | 0.02964567 |        |            | 0.056  | 0.01237472 |
| quinolinate                                         | Nicotinate and Nicotinamide Metabolism               | Cofactors and Vitamins | -0.087 | 0.03223069 |        |            | -0.091 | 0.0342017  |
| 16a-hydroxy DHEA 3-sulfate                          | Androgenic Steroids                                  | Lipid                  | 0.042  | 0.03252006 |        |            | 0.05   | 0.0097586  |
| 1-stearoyl-2-linoleoyl-GPC (18:0/18:2)*             | Phosphatidylcholine (PC)                             | Lipid                  | 0.13   | 0.03567173 |        |            | 0.15   | 0.01612179 |
| 3-ureidopropionate                                  | Pyrimidine Metabolism, Uracil containing             | Nucleotide             | -0.18  | 0.03573385 |        |            | -0.181 | 0.018683   |
| 1,5-anhydroglucitol (1,5-AG)                        | Glycolysis, Gluconeogenesis, and Pyruvate Metabolism | Carbohydrate           | 0.062  | 0.03793341 |        |            | 0.103  | 0.00018146 |
| pyridoxate                                          | Vitamin B6 Metabolism                                | Cofactors and Vitamins | 0.069  | 0.03812286 |        |            | 0.092  | 0.00247425 |
| 1-palmitoyl-2-arachidonoyl-GPI (16:0/20:4)*         | Phosphatidylinositol (PI)                            | Lipid                  | 0.109  | 0.04000976 |        |            | 0.119  | 0.0216564  |
| 1-stearoyl-2-docosahexaenoyl-GPE (18:0/22:6)*       | Phosphatidylethanolamine (PE)                        | Lipid                  | 0.108  | 0.04170345 |        |            | 0.107  | 0.00095383 |
| 1-(1-enyl-palmitoyl)-GPC (P-16:0)*                  | Lysoplasmalogen                                      | Lipid                  | -0.173 | 0.04611967 |        |            | -0.237 | 0.02347027 |
| phenyllactate (PLA)                                 | Phenylalanine Metabolism                             | Amino Acid             | 0.09   | 0.04664857 |        |            | 0.081  | 0.02263569 |
| <b>Gradients between SVC-PA and ART-SVC samples</b> |                                                      |                        |        |            |        |            |        |            |
| 5,6-dihydrothymine                                  | Pyrimidine Metabolism, Thymine containing            | Nucleotide             |        |            | -0.702 | 6.1669E-11 | -0.548 | 3.5702E-09 |
| myristoleate (14:1n5)                               | Long Chain Fatty Acid                                | Lipid                  |        |            | -0.215 | 2.2062E-09 | -0.138 | 9.9553E-06 |
| succinate                                           | TCA Cycle                                            | Energy                 |        |            | -0.561 | 5.6399E-09 | -0.518 | 4.7923E-06 |
| 5-dodecenoate (12:1n7)                              | Medium Chain Fatty Acid                              | Lipid                  |        |            | -0.188 | 1.4414E-08 | -0.115 | 2.7952E-05 |
| glycerol                                            | Glycerolipid Metabolism                              | Lipid                  |        |            | -0.351 | 4.492E-08  | -0.346 | 5.2117E-06 |

|                                                   |                                                            |            |  |  |        |            |        |            |
|---------------------------------------------------|------------------------------------------------------------|------------|--|--|--------|------------|--------|------------|
| orotate                                           | Pyrimidine Metabolism,<br>Orotate containing               | Nucleotide |  |  | -0.182 | 6.148E-08  | -0.265 | 2.4564E-09 |
| laurate (12:0)                                    | Medium Chain Fatty Acid                                    | Lipid      |  |  | -0.18  | 4.0707E-07 | -0.247 | 2.9391E-09 |
| myristate (14:0)                                  | Long Chain Fatty Acid                                      | Lipid      |  |  | -0.189 | 4.6872E-07 | -0.123 | 0.00057078 |
| 7-alpha-hydroxy-3-oxo-4-cholestenoate<br>(7-Hoca) | Sterol                                                     | Lipid      |  |  | -0.308 | 7.0852E-07 | -0.284 | 1.4406E-08 |
| linolenate [alpha or gamma; (18:3n3 or<br>6)]     | Polyunsaturated Fatty Acid<br>(n3 and n6)                  | Lipid      |  |  | -0.144 | 1.61E-06   | -0.07  | 0.00959807 |
| 3-hydroxylaurate                                  | Fatty Acid, Monohydroxy                                    | Lipid      |  |  | -0.174 | 4.7676E-06 | -0.151 | 6.3924E-05 |
| gamma-glutamylglutamate                           | Gamma-glutamyl Amino<br>Acid                               | Peptide    |  |  | 0.406  | 2.2447E-05 | 0.536  | 6.0645E-08 |
| xanthine                                          | Purine Metabolism,<br>(Hypo)Xanthine/Inosine<br>containing | Nucleotide |  |  | -0.12  | 2.7189E-05 | -0.096 | 7.5074E-05 |
| 3-hydroxybutyrate (BHBA)                          | Ketone Bodies                                              | Lipid      |  |  | 0.128  | 3.1815E-05 | 0.191  | 1.7422E-06 |
| creatine                                          | Creatine Metabolism                                        | Amino Acid |  |  | 0.135  | 5.4254E-05 | 0.154  | 7.5074E-05 |
| choline                                           | Phospholipid Metabolism                                    | Lipid      |  |  | -0.182 | 7.0016E-05 | -0.127 | 0.00450938 |
| caprate (10:0)                                    | Medium Chain Fatty Acid                                    | Lipid      |  |  | -0.114 | 7.1324E-05 | -0.106 | 0.00017611 |
| glutamine                                         | Glutamate Metabolism                                       | Amino Acid |  |  | -0.241 | 0.00014192 | -0.165 | 0.0216564  |
| docosapentaenoate (n3 DPA; 22:5n3)                | Polyunsaturated Fatty Acid<br>(n3 and n6)                  | Lipid      |  |  | -0.151 | 0.00037289 | -0.154 | 0.00088718 |
| linoleate (18:2n6)                                | Polyunsaturated Fatty Acid<br>(n3 and n6)                  | Lipid      |  |  | -0.128 | 0.00038275 | -0.086 | 0.01338683 |
| 5-oxoproline                                      | Glutathione Metabolism                                     | Amino Acid |  |  | -0.204 | 0.00053368 | -0.188 | 0.0088785  |
| trans-4-hydroxyproline                            | Urea cycle; Arginine and<br>Proline Metabolism             | Amino Acid |  |  | -0.11  | 0.00067213 | -0.124 | 5.7976E-05 |
| citrulline                                        | Urea cycle; Arginine and<br>Proline Metabolism             | Amino Acid |  |  | 0.163  | 0.00076679 | 0.151  | 0.00331986 |
| alanine                                           | Alanine and Aspartate<br>Metabolism                        | Amino Acid |  |  | -0.223 | 0.0008132  | -0.211 | 0.00196605 |

|                                                       |                                             |                        |        |            |        |            |        |            |
|-------------------------------------------------------|---------------------------------------------|------------------------|--------|------------|--------|------------|--------|------------|
| docosahexaenoate (DHA; 22:6n3)                        | Polyunsaturated Fatty Acid (n3 and n6)      | Lipid                  |        |            | -0.159 | 0.00094698 | -0.228 | 6.2582E-06 |
| deoxycarnitine                                        | Carnitine Metabolism                        | Lipid                  |        |            | -0.12  | 0.00160152 | -0.087 | 0.02712928 |
| guanidinoacetate                                      | Creatine Metabolism                         | Amino Acid             |        |            | -0.118 | 0.00199572 | -0.2   | 6.5855E-05 |
| caprylate (8:0)                                       | Medium Chain Fatty Acid                     | Lipid                  |        |            | -0.169 | 0.0036433  | -0.133 | 0.03840176 |
| serine                                                | Glycine, Serine and Threonine Metabolism    | Amino Acid             |        |            | 0.14   | 0.00935717 | 0.112  | 0.00725554 |
| pentadecanoate (15:0)                                 | Long Chain Fatty Acid                       | Lipid                  |        |            | -0.157 | 0.01427051 | -0.093 | 0.04481935 |
| 3-methyl-2-oxovalerate                                | Leucine, Isoleucine and Valine Metabolism   | Amino Acid             |        |            | 0.143  | 0.01624892 | 0.123  | 0.03395985 |
| indoleacetate                                         | Tryptophan Metabolism                       | Amino Acid             |        |            | 0.054  | 0.01785248 | 0.076  | 0.00272741 |
| phosphate                                             | Oxidative Phosphorylation                   | Energy                 |        |            | 0.164  | 0.01927463 | 0.274  | 5.7047E-05 |
| 13-HODE + 9-HODE                                      | Fatty Acid, Monohydroxy                     | Lipid                  |        |            | -0.13  | 0.02857954 | -0.184 | 0.00280084 |
| 4-methyl-2-oxopentanoate                              | Leucine, Isoleucine and Valine Metabolism   | Amino Acid             |        |            | 0.081  | 0.03931529 | 0.102  | 0.01237472 |
| <b>Gradients between PA-ART samples</b>               |                                             |                        |        |            |        |            |        |            |
| choline phosphate                                     | Phospholipid Metabolism                     | Lipid                  | -0.471 | 0.0007693  |        |            |        |            |
| 1-(1-enyl-stearoyl)-2-arachidonoyl-GPE (P-18:0/20:4)* | Plasmalogen                                 | Lipid                  | -0.294 | 0.00168983 |        |            |        |            |
| nicotinamide                                          | Nicotinate and Nicotinamide Metabolism      | Cofactors and Vitamins | -0.394 | 0.00535394 |        |            |        |            |
| homoarginine                                          | Urea cycle; Arginine and Proline Metabolism | Amino Acid             | 0.092  | 0.00576202 |        |            |        |            |
| 1-palmitoyl-GPE (16:0)                                | Lysophospholipid                            | Lipid                  | -0.205 | 0.00646447 |        |            |        |            |
| bilirubin (E,E)*                                      | Hemoglobin and Porphyrin Metabolism         | Cofactors and Vitamins | -0.207 | 0.00978439 |        |            |        |            |
| 1-(1-enyl-palmitoyl)-2-oleoyl-GPE (P-16:0/18:1)*      | Plasmalogen                                 | Lipid                  | -0.199 | 0.01436973 |        |            |        |            |
| betaine                                               | Glycine, Serine and Threonine Metabolism    | Amino Acid             | 0.089  | 0.0280844  |        |            |        |            |

|                                                     |                                                      |              |        |            |        |            |       |            |
|-----------------------------------------------------|------------------------------------------------------|--------------|--------|------------|--------|------------|-------|------------|
| 1-arachidonoyl-GPE (20:4n6)*                        | Lysophospholipid                                     | Lipid        | -0.123 | 0.03247541 |        |            |       |            |
| <b>Gradients between SVC-PA samples</b>             |                                                      |              |        |            |        |            |       |            |
| lactate                                             | Glycolysis, Gluconeogenesis, and Pyruvate Metabolism | Carbohydrate |        |            | -0.215 | 2.1564E-06 |       |            |
| N-formylmethionine                                  | Methionine, Cysteine, SAM and Taurine Metabolism     | Amino Acid   |        |            | -0.185 | 6.8059E-06 |       |            |
| 7-methylguanine                                     | Purine Metabolism, Guanine containing                | Nucleotide   |        |            | -0.165 | 0.00016298 |       |            |
| 3-(4-hydroxyphenyl)lactate                          | Tyrosine Metabolism                                  | Amino Acid   |        |            | -0.124 | 0.00040297 |       |            |
| N-acetylputrescine                                  | Polyamine Metabolism                                 | Amino Acid   |        |            | -0.109 | 0.0004531  |       |            |
| isoleucine                                          | Leucine, Isoleucine and Valine Metabolism            | Amino Acid   |        |            | 0.171  | 0.00144109 |       |            |
| palmitoleate (16:1n7)                               | Long Chain Fatty Acid                                | Lipid        |        |            | -0.116 | 0.00152404 |       |            |
| 10-heptadecenoate (17:1n7)                          | Long Chain Fatty Acid                                | Lipid        |        |            | -0.109 | 0.00201883 |       |            |
| 3-hydroxy-2-ethylpropionate                         | Leucine, Isoleucine and Valine Metabolism            | Amino Acid   |        |            | -0.201 | 0.0043224  |       |            |
| 3-hydroxydecanoate                                  | Fatty Acid, Monohydroxy                              | Lipid        |        |            | -0.091 | 0.00465296 |       |            |
| trans-urocanate                                     | Histidine Metabolism                                 | Amino Acid   |        |            | -0.343 | 0.01140618 |       |            |
| 1-palmitoyl-2-stearoyl-GPC (16:0/18:0)              | Phosphatidylcholine (PC)                             | Lipid        |        |            | 0.182  | 0.01629051 |       |            |
| 3-hydroxyoctanoate                                  | Fatty Acid, Monohydroxy                              | Lipid        |        |            | -0.097 | 0.02857954 |       |            |
| <b>Gradients between ART-SVC samples</b>            |                                                      |              |        |            |        |            |       |            |
| leucine                                             | Leucine, Isoleucine and Valine Metabolism            | Amino Acid   |        |            |        |            | 0.174 | 0.00028644 |
| 1-stearoyl-2-docosahexaenoyl-GPC (18:0/22:6)        | Phosphatidylcholine (PC)                             | Lipid        |        |            |        |            | 0.126 | 0.0003638  |
| sphingomyelin (d18:2/23:0, d18:1/23:1, d17:1/24:1)* | Sphingomyelins                                       | Lipid        |        |            |        |            | 0.119 | 0.0009553  |
| vanillylmandelate (VMA)                             | Tyrosine Metabolism                                  | Amino Acid   |        |            |        |            | 0.118 | 0.00216943 |



|                                                     |                                          |            |  |  |  |  |        |            |
|-----------------------------------------------------|------------------------------------------|------------|--|--|--|--|--------|------------|
| gamma-glutamyl-epsilon-lysine                       | Gamma-glutamyl Amino Acid                | Peptide    |  |  |  |  | -0.265 | 0.00228894 |
| 1-palmitoyl-2-oleoyl-GPC (16:0/18:1)                | Phosphatidylcholine (PC)                 | Lipid      |  |  |  |  | 0.177  | 0.00241612 |
| imidazole propionate                                | Histidine Metabolism                     | Amino Acid |  |  |  |  | 0.129  | 0.00246402 |
| 1-stearoyl-2-oleoyl-GPC (18:0/18:1)                 | Phosphatidylcholine (PC)                 | Lipid      |  |  |  |  | 0.173  | 0.00255738 |
| 1-linoleoyl-2-linolenoyl-GPC (18:2/18:3)*           | Phosphatidylcholine (PC)                 | Lipid      |  |  |  |  | 0.122  | 0.00267674 |
| gamma-glutamylmethionine                            | Gamma-glutamyl Amino Acid                | Peptide    |  |  |  |  | -0.199 | 0.00298366 |
| 1-myristoyl-2-arachidonoyl-GPC (14:0/20:4)*         | Phosphatidylcholine (PC)                 | Lipid      |  |  |  |  | 0.116  | 0.00331986 |
| 1-(1-enyl-stearoyl)-2-linoleoyl-GPE (P-18:0/18:2)*  | Plasmalogen                              | Lipid      |  |  |  |  | 0.086  | 0.00399784 |
| sphingomyelin (d18:1/21:0, d17:1/22:0, d16:1/23:0)* | Sphingomyelins                           | Lipid      |  |  |  |  | 0.085  | 0.00520102 |
| 1-palmitoyl-2-docosahexaenoyl-GPE (16:0/22:6)*      | Phosphatidylethanolamine (PE)            | Lipid      |  |  |  |  | 0.083  | 0.00586853 |
| 1-oleoyl-2-docosahexaenoyl-GPC (18:1/22:6)*         | Phosphatidylcholine (PC)                 | Lipid      |  |  |  |  | 0.18   | 0.00725554 |
| N-acetylserine                                      | Glycine, Serine and Threonine Metabolism | Amino Acid |  |  |  |  | -0.108 | 0.00791607 |
| 1,2-dilinoleoyl-GPC (18:2/18:2)                     | Phosphatidylcholine (PC)                 | Lipid      |  |  |  |  | 0.1    | 0.00828729 |
| phenylpyruvate                                      | Phenylalanine Metabolism                 | Amino Acid |  |  |  |  | 0.215  | 0.00918305 |
| glycochenodeoxycholate glucuronide (1)              | Primary Bile Acid Metabolism             | Lipid      |  |  |  |  | 0.066  | 0.00952848 |
| N-acetyltryptophan                                  | Tryptophan Metabolism                    | Amino Acid |  |  |  |  | 0.12   | 0.01174907 |
| androsterone sulfate                                | Androgenic Steroids                      | Lipid      |  |  |  |  | 0.067  | 0.01181751 |
| indolepropionate                                    | Tryptophan Metabolism                    | Amino Acid |  |  |  |  | 0.052  | 0.01237472 |
| 1-stearoyl-2-arachidonoyl-GPC (18:0/20:4)           | Phosphatidylcholine (PC)                 | Lipid      |  |  |  |  | 0.145  | 0.01262466 |

|                                                        |                                             |            |  |  |  |  |        |            |
|--------------------------------------------------------|---------------------------------------------|------------|--|--|--|--|--------|------------|
| glycocholate sulfate*                                  | Secondary Bile Acid Metabolism              | Lipid      |  |  |  |  | 0.095  | 0.01447754 |
| 1-palmitoyl-2-linoleoyl-GPE (16:0/18:2)                | Phosphatidylethanolamine (PE)               | Lipid      |  |  |  |  | 0.07   | 0.01520143 |
| sphingomyelin (d18:1/18:1, d18:2/18:0)                 | Sphingomyelins                              | Lipid      |  |  |  |  | 0.076  | 0.01520143 |
| sphingomyelin (d18:1/20:1, d18:2/20:0)*                | Sphingomyelins                              | Lipid      |  |  |  |  | 0.094  | 0.01547065 |
| orotidine                                              | Pyrimidine Metabolism, Orotate containing   | Nucleotide |  |  |  |  | -0.06  | 0.01618316 |
| gamma-glutamylglutamine                                | Gamma-glutamyl Amino Acid                   | Peptide    |  |  |  |  | -0.202 | 0.01651043 |
| sphingomyelin (d18:1/22:1, d18:2/22:0, d16:1/24:1)*    | Sphingomyelins                              | Lipid      |  |  |  |  | 0.11   | 0.01774506 |
| tryptophan                                             | Tryptophan Metabolism                       | Amino Acid |  |  |  |  | 0.109  | 0.01784552 |
| 1-(1-enyl-palmitoyl)-2-arachidonoyl-GPC (P-16:0/20:4)* | Plasmalogen                                 | Lipid      |  |  |  |  | 0.114  | 0.01790998 |
| 2-hydroxystearate                                      | Fatty Acid, Monohydroxy                     | Lipid      |  |  |  |  | -0.238 | 0.02142168 |
| N-acetylalanine                                        | Alanine and Aspartate Metabolism            | Amino Acid |  |  |  |  | -0.128 | 0.0222828  |
| trimethylamine N-oxide                                 | Phospholipid Metabolism                     | Lipid      |  |  |  |  | 0.056  | 0.02263569 |
| alpha-hydroxyisovalerate                               | Leucine, Isoleucine and Valine Metabolism   | Amino Acid |  |  |  |  | 0.057  | 0.02375697 |
| 1-palmitoyl-2-docosahexaenoyl-GPC (16:0/22:6)          | Phosphatidylcholine (PC)                    | Lipid      |  |  |  |  | 0.126  | 0.02492348 |
| uridine                                                | Pyrimidine Metabolism, Uracil containing    | Nucleotide |  |  |  |  | 0.095  | 0.02766267 |
| N-methylproline                                        | Urea cycle; Arginine and Proline Metabolism | Amino Acid |  |  |  |  | 0.041  | 0.02913395 |
| 1-linoleoyl-2-arachidonoyl-GPC (18:2/20:4n6)*          | Phosphatidylcholine (PC)                    | Lipid      |  |  |  |  | 0.099  | 0.03010652 |
| N-acetylphenylalanine                                  | Phenylalanine Metabolism                    | Amino Acid |  |  |  |  | 0.092  | 0.03270972 |

|                                                     |                                           |            |  |  |  |  |       |            |
|-----------------------------------------------------|-------------------------------------------|------------|--|--|--|--|-------|------------|
| 3-methylglutaryl carnitine (2)                      | Leucine, Isoleucine and Valine Metabolism | Amino Acid |  |  |  |  | 0.079 | 0.03413624 |
| sphingomyelin (d18:2/24:1, d18:1/24:2)*             | Sphingomyelins                            | Lipid      |  |  |  |  | 0.099 | 0.0342017  |
| 1,2-dipalmitoyl-GPC (16:0/16:0)                     | Phosphatidylcholine (PC)                  | Lipid      |  |  |  |  | 0.145 | 0.03528075 |
| phenylacetylglutamine                               | Acetylated Peptides                       | Peptide    |  |  |  |  | 0.063 | 0.03894162 |
| 2-hydroxy-3-methylvalerate                          | Leucine, Isoleucine and Valine Metabolism | Amino Acid |  |  |  |  | 0.091 | 0.04416028 |
| sphingomyelin (d18:1/17:0, d17:1/18:0, d19:1/16:0)  | Sphingomyelins                            | Lipid      |  |  |  |  | 0.083 | 0.04456191 |
| 1-(1-enyl-palmitoyl)-2-linoleoyl-GPC (P-16:0/18:2)* | Plasmalogen                               | Lipid      |  |  |  |  | 0.068 | 0.0462457  |

Supplementary Table S6. Full list of metabolites with nominally significant tissue gradients

| Sub-pathway                                          | Metabolites tested in the pathway | SVC-PA | Sig.   | PA-ART | Sig.   | ART-SVC | Sig.   | SVC-PA only | Sig. | PA-ART only | Sig.   | ART-SVC only | Sig.   |
|------------------------------------------------------|-----------------------------------|--------|--------|--------|--------|---------|--------|-------------|------|-------------|--------|--------------|--------|
| <b>Pathway showing enrichment</b>                    |                                   |        |        |        |        |         |        |             |      |             |        |              |        |
| Polyunsaturated Fatty Acid (n3 and n6)               | 12                                | 8      | 0.0002 | 4      | 0.31   | 8       | 0.0241 |             |      |             |        |              |        |
| TCA Cycle                                            | 6                                 | 5      | 0.0008 | 4      | 0.0243 | 4       | 0.1    |             |      |             |        |              |        |
| Medium Chain Fatty Acid                              | 5                                 | 4      | 0.0038 |        |        | 4       | 0.0431 |             |      |             |        |              |        |
| Phosphatidylcholine (PC)                             | 17                                | 1      | 0.33   | 4      | 1      | 15      | 0.0000 | 1           | 0.5  |             |        | 11           | 0      |
| Nicotinate and Nicotinamide Metabolism               | 5                                 | 1      | 1      | 5      | 0.0005 | 4       | 0.0431 |             |      | 1           | 0.13   |              |        |
| Phospholipid Metabolism                              | 6                                 | 1      | 1      | 4      | 0.0243 | 5       | 0.0166 |             |      | 1           | 0.15   | 1            | 0.57   |
| Lysophospholipid                                     | 23                                |        |        | 14     | 0.0000 | 12      | 0.07   |             |      | 2           | 0.12   |              |        |
| Lysoplasmalogen                                      | 4                                 |        |        | 4      | 0.0024 | 4       | 0.0116 |             |      |             |        |              |        |
| Aminosugar Metabolism                                | 4                                 |        |        | 3      | 0.0363 | 3       | 0.11   |             |      |             |        |              |        |
| Pentose Metabolism                                   | 4                                 |        |        | 3      | 0.0363 | 3       | 0.11   |             |      |             |        |              |        |
| Plasmalogen                                          | 11                                |        |        | 3      | 0.71   | 4       | 0.76   |             |      | 2           | 0.0322 | 3            | 0.16   |
| Secondary Bile Acid Metabolism                       | 15                                |        |        |        |        | 1       | 0.0261 |             |      |             |        | 1            | 0.7    |
| Sphingomyelins                                       | 16                                |        |        |        |        | 7       | 0.42   |             |      |             |        | 7            | 0.0019 |
| <b>Pathways not showing enrichment</b>               |                                   |        |        |        |        |         |        |             |      |             |        |              |        |
| Long Chain Fatty Acid                                | 14                                | 5      | 0.08   |        |        | 3       | 0.41   | 2           | 0.1  |             |        |              |        |
| Glutamate Metabolism                                 | 9                                 | 3      | 0.2    | 2      | 1      | 2       | 0.72   |             |      |             |        |              |        |
| Purine Metabolism, (Hypo)Xanthine/Inosine containing | 6                                 | 2      | 0.28   | 2      | 0.62   | 2       | 1      |             |      |             |        |              |        |
| Tryptophan Metabolism                                | 14                                | 1      | 0.48   |        |        | 4       | 1      |             |      |             |        | 3            | 0.41   |
| Fructose, Mannose and Galactose Metabolism           | 4                                 | 1      | 0.54   | 2      | 0.22   | 1       | 1      |             |      |             |        |              |        |
| Sterol                                               | 4                                 | 1      | 0.54   |        |        | 1       | 1      |             |      |             |        |              |        |
| Histidine Metabolism                                 | 11                                | 1      | 0.7    | 1      | 0.47   | 2       | 0.35   | 1           | 0.36 |             |        | 1            | 1      |

|                                                  |    |   |      |   |      |   |      |   |          |   |      |   |      |
|--------------------------------------------------|----|---|------|---|------|---|------|---|----------|---|------|---|------|
| Leucine, Isoleucine and Valine Metabolism        | 21 | 4 | 0.77 | 2 | 0.19 | 8 | 0.64 | 2 | 0.1<br>9 |   |      | 4 | 0.5  |
| Urea cycle; Arginine and Proline Metabolism      | 16 | 3 | 1    | 2 | 0.54 | 4 | 0.6  |   |          | 1 | 0.37 | 1 | 0.71 |
| Methionine, Cysteine, SAM and Taurine Metabolism | 17 | 3 | 1    | 5 | 0.55 | 3 | 0.2  | 1 | 0.5      |   |      |   |      |
| Tyrosine Metabolism                              | 14 | 2 | 1    | 2 | 0.74 | 2 | 0.16 | 1 | 0.4<br>3 |   |      | 1 | 1    |
| Glycine, Serine and Threonine Metabolism         | 10 | 1 | 1    | 2 | 1    | 3 | 1    |   |          | 1 | 0.25 | 1 | 1    |
| Polyamine Metabolism                             | 5  | 1 | 1    |   |      |   |      | 1 | 0.1<br>8 |   |      |   |      |
| Androgenic Steroids                              | 11 |   |      | 1 | 0.47 | 2 | 0.35 |   |          |   |      | 1 | 1    |
| Hemoglobin and Porphyrin Metabolism              | 7  |   |      | 2 | 0.66 | 1 | 0.43 |   |          | 1 | 0.18 |   |      |
| Fatty Acid, Dicarboxylate                        | 4  |   |      | 1 | 1    | 1 | 1    |   |          |   |      |   |      |
| Phosphatidylinositol (PI)                        | 5  |   |      | 1 | 1    | 1 | 1    |   |          |   |      |   |      |
| Purine Metabolism, Adenine containing            | 4  |   |      | 1 | 1    | 1 | 1    |   |          |   |      |   |      |
| Primary Bile Acid Metabolism                     | 9  |   |      |   |      | 1 | 0.28 |   |          |   |      | 1 | 1    |
| Acetylated Peptides                              | 4  |   |      |   |      | 1 | 1    |   |          |   |      | 1 | 0.43 |

**Supplementary Table S7. Enrichment analysis of all pathways.** Enrichment was first tested for metabolites with gradients in each analysis, irrespective of overlap between analyses, and then in those metabolites specifically with gradients in only one of the three analyses, SVC-PA, PA-ART or ART-SVC.

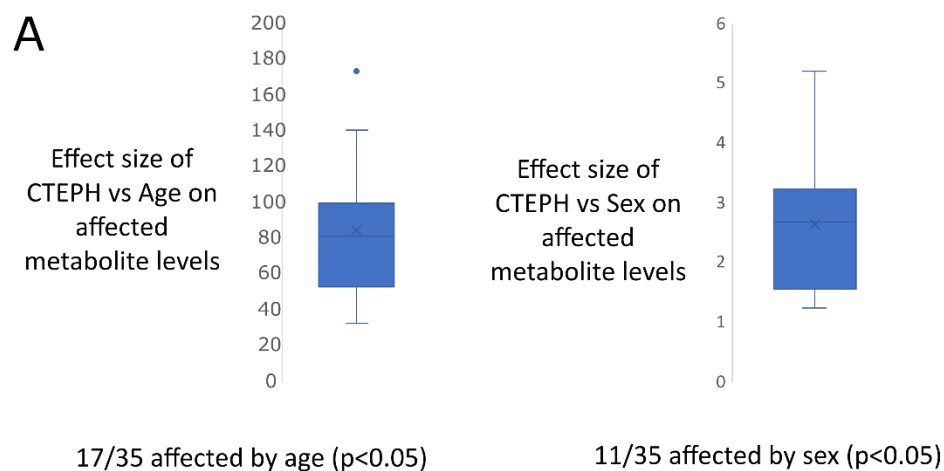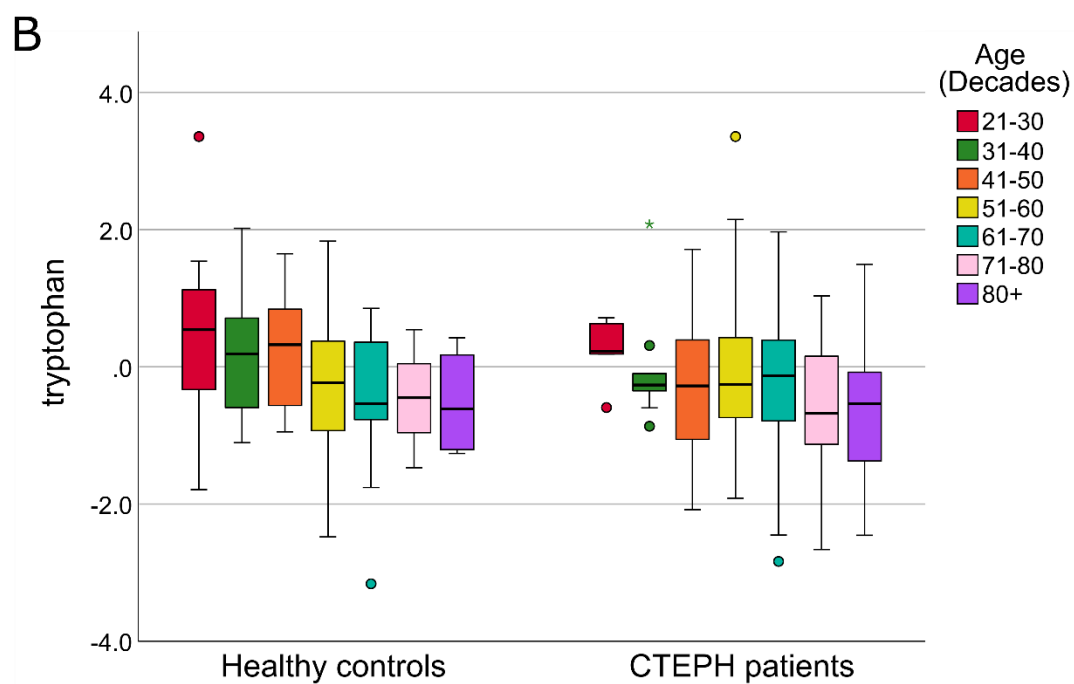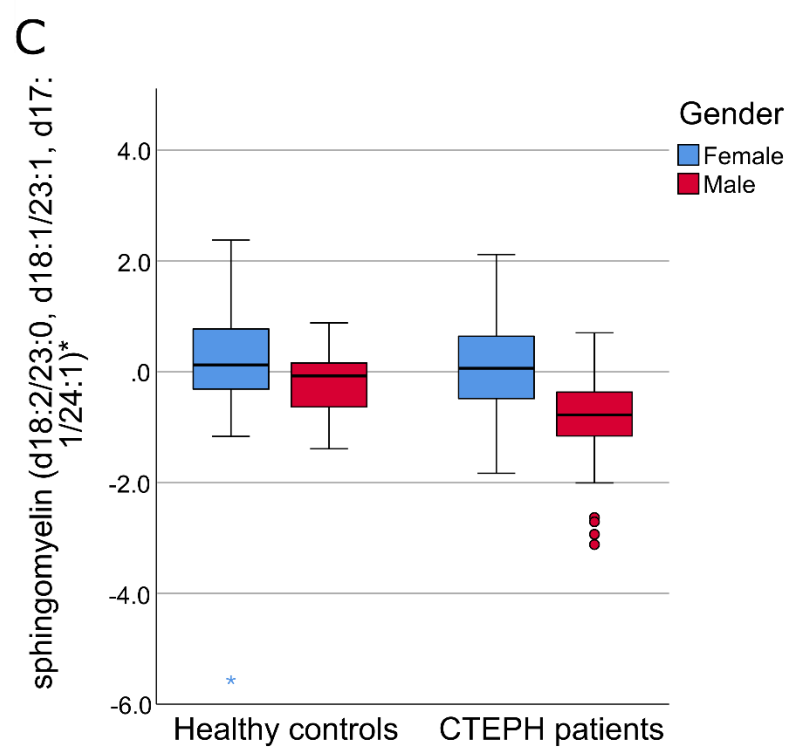

Supplementary Figure S1 – Effect of age and gender on metabolites associated with CTEPH. A. Ratio of effect sizes of CTEPH (versus healthy controls) compared to age and gender for metabolites significantly affected by age or gender, indicating generally larger (>1 ratio) effect of CTEPH status. B. Boxplot of CTEPH-associated metabolite most affected by age, tryptophan, in healthy controls and CTEPH patients divided by age in decades. C. Boxplot of CTEPH-associated metabolite most affected by gender, sphingomyelin (d18:2/23:0, d18:1/23:1, d17:1/24:1)\*, in healthy controls and CTEPH patients divided by self-reported gender.

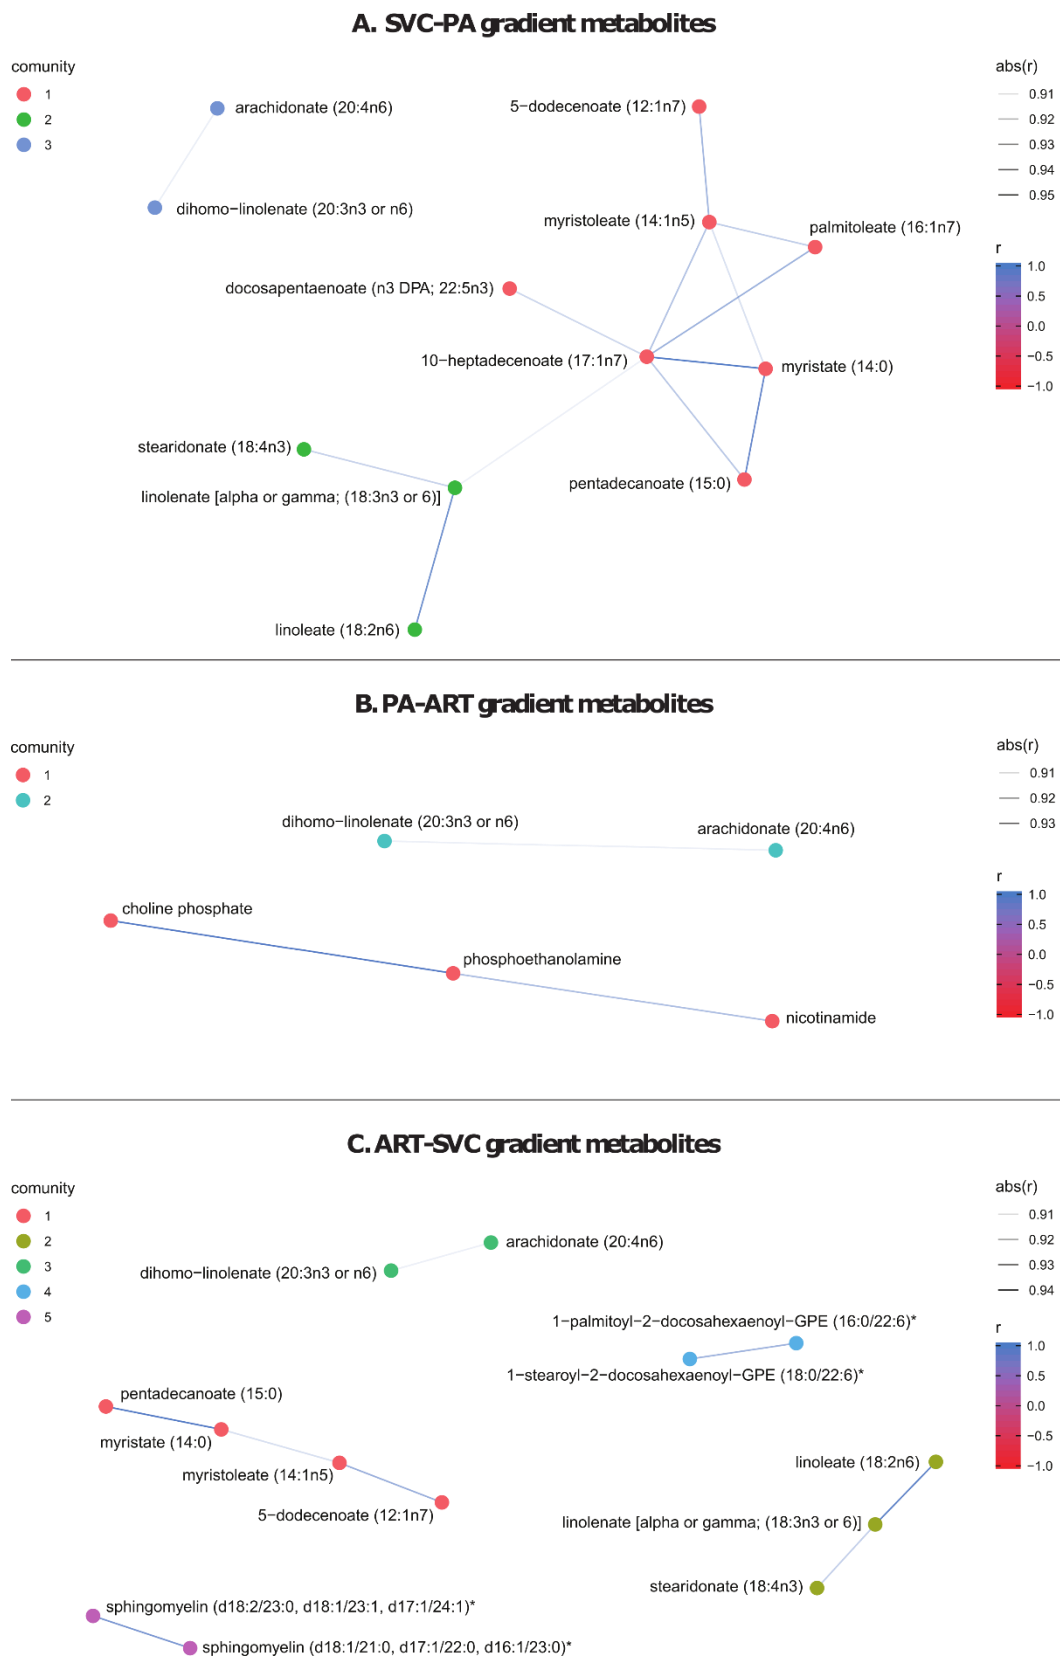

**Supplementary Figure S2. Relevance network analysis.** Network of highly correlated ( $r > 0.9$ ) metabolites showing SVC-PA (A), PA-ART (B) or ART-SVC (C) gradients.



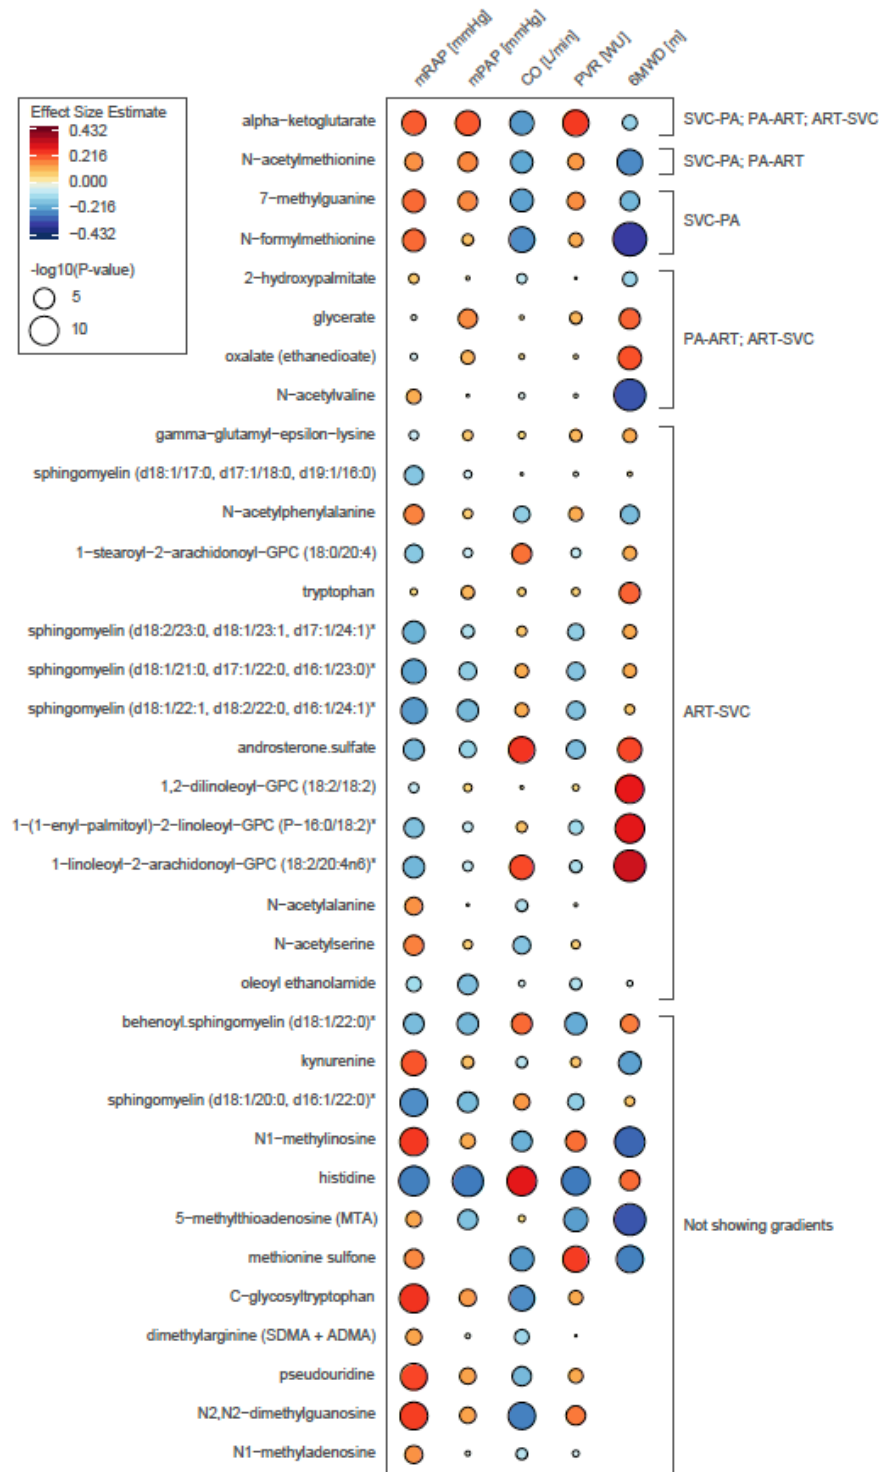

Supplementary Figure S3. Associations between clinical variables and plasma metabolites that distinguish CTEPH from healthy and disease controls. Directionality and magnitude of estimates are presented by colour fill scale (red for positive and blue for negative directionality), corresponding p-values are represented by circle size.

### Supplementary References

1. Rosenkranz S, Preston IR. Right heart catheterisation: best practice and pitfalls in pulmonary hypertension. *Eur Respir Rev.* 2015;24(138):642-52.
2. Shenoy V, Anton JM, Collard CD, Youngblood SC. Pulmonary thromboendarterectomy for chronic thromboembolic pulmonary hypertension. *Anesthesiology.* 2014;120(5):1255-61.
3. Jamieson SW, Kapelanski DP, Sakakibara N, Manecke GR, Thistlethwaite PA, Kerr KM, et al. Pulmonary endarterectomy: experience and lessons learned in 1,500 cases. *Ann Thorac Surg.* 2003;76(5):1457-62; discussion 62-4.
